1 **Regulation of Human Neutrophil Responses to *Candida albicans* by Carcinoembryonic**  
2 **Antigen-Related Cell Adhesion Molecule 1 (CEACAM1), CEACAM3 and CEACAM6**

3 Esther Klaile<sup>1</sup>, Juan Pablo Prada Salcedo<sup>2</sup>, Tilman E. Klassert<sup>1</sup>, Matthias Besemer<sup>1</sup>, Anne-Katrin  
4 Bothe<sup>1</sup>, Adrian Durotin<sup>1</sup>, Mario M. Müller<sup>1</sup>, Verena Schmitt<sup>4</sup>, Christian H. Luther<sup>2</sup>, Marcus  
5 Dittrich<sup>2,3</sup>, Bernhard B. Singer<sup>4</sup>, Thomas Dandekar<sup>2</sup>, Hortense Slevogt<sup>1</sup>

6  
7 <sup>1</sup>ZIK Septomics, University Hospital Jena, Jena, Germany

8 <sup>2</sup>Dept. of Bioinformatics, Biocenter, Am Hubland, University of Würzburg, 97074 Würzburg,  
9 Germany

10 <sup>3</sup>Dept. of human genetics, Biocenter, Am Hubland, University of Würzburg, 97074 Würzburg,  
11 Germany

12 <sup>4</sup>Institute of Anatomy, University Hospital, University Duisburg-Essen, Essen, Germany

13  
14 Running Head: CEACAM6 regulates neutrophil responses to *C. albicans*

15  
16 #Address correspondence to: [esther.klaile@med.uni-jena.de](mailto:esther.klaile@med.uni-jena.de)

17 Esther Klaile and Juan Pablo Prada Salcedo contributed equally to this work. Author order was  
18 determined on the basis of seniority.

19 Thomas Dandekar and Hortense Slevogt contributed equally to this work. Author order was  
20 determined on the basis of alphabetical order.

21  
22 **Abstract**

23 Invasive candidiasis, mainly caused by the pathogen *Candida albicans*, is an important health-care-  
24 associated fungal infection that results in mortality rates as high as 40%. Neutrophils are the first  
25 line of defense during *Candida* infections. They can launch various killing mechanisms and release  
26 cytokines to attract further immune cells to the site of infection. These responses are closely  
27 controlled, since they can also result in severe tissue/organ damage. We hypothesized that the  
28 regulation of *C. albicans*-specific neutrophil functions by the immunoregulatory *C. albicans*  
29 receptors CEACAM1, CEACAM3, and CEACAM6 are involved in the immune pathology of  
30 candidemia. Here, we analyzed the effects of specific antibodies targeting the three CEACAM  
31 receptors on *C. albicans*-induced neutrophil responses. We show that CEACAM6 ligation  
32 significantly enhanced the immediate response to *C. albicans*, as shown by the increased  
33 CXCL8/IL-8 degranulation. By assessing the transcriptional responses, we found that CEACAM6  
34 ligation and to some extent CEACAM1 ligation, but not CEACAM3 ligation led to an altered gene  
35 regulation of the *C. albicans*-stimulated neutrophils. Differentially expressed genes were analyzed  
36 with different bioinformatic methods for the affected cellular processes and signaling pathways  
37 including dynamic simulations of signaling cascades. We verified predicted alterations with regard  
38 to IL-1 $\beta$ /IL-6 expression and apoptosis induction after *C. albicans* stimulation. Taken together, we  
39 could demonstrate for the first time that CEACAM receptors have an important and differential  
40 impact in regulating *C. albicans*-induced immune functions in human neutrophils. In particular,  
41 CEACAM6 ligation modulated neutrophil apoptosis and cytokine release in responses to  
42 *C. albicans*.

43

#### 44 **Importance**

45 *Candida albicans* is a major threat to immunosuppressed or critically ill patients. Invasive  
46 candidiasis results in mortality rates as high as 40%, even when patients receive antifungal therapy.  
47 Neutrophils are key players in the innate host defense against *C. albicans*. They can launch various  
48 killing mechanisms, but they also release cytokines to attract further immune cells to the site of  
49 infection. However, prolonged attraction of neutrophils is a known risk factor for the development  
50 of tissue/organ damage. Here, we analyze how three immunoregulatory receptors of the CEACAM  
51 family regulate the neutrophil responses to the major human fungal pathogen, *Candida albicans*.  
52 Our data suggest that the inhibition of the CEACAM receptors might be a future therapeutical  
53 approach to prevent the overreaction of the immune system such as in systemic infections that often  
54 results in organ failure and death of the patients.

55

#### 56 **Introduction**

57 Invasive candidiasis is the most common fungal disease among hospitalized patients in the  
58 developed world, and the fourth most common bloodstream infection in intensive care units (1).  
59 Invasive candidiasis results in mortality rates as high as 40%, even when patients receive antifungal  
60 therapy, and *Candida albicans* causes the majority of these infections (1).

61 Neutrophils are key players in the host defense against fungal pathogens. These short-lived  
62 innate immune cells react instantly and launch intracellular and extracellular killing mechanisms  
63 like the production of reactive oxygen species and microbicidal peptides, or the release of  
64 neutrophil extracellular traps (2). Neutrophils also release stored cytokines and produce new ones  
65 to attract further immune cells to the site of infection (3). While the total amounts of the secreted  
66 cytokines per neutrophil are rather small compared to other immune cells, neutrophils usually  
67 greatly outnumber mononuclear leukocytes in inflammatory sites by 1-2 orders of magnitude,  
68 implying that they can certainly have a major influence on the local and systemic overall  
69 development of the immune response (3).

70 The neutrophil responses necessary for the quick eradication of pathogens are tightly  
71 controlled, since they can also have cytotoxic side effects and result in severe tissue/organ damage,  
72 that can subsequently lead to organ failure(s) and the death of the patient (2, 4, 5). Mechanisms for  
73 restricted neutrophil activity include the up or down regulation of various surface receptors and  
74 intracellular proteins within important signaling pathways, as recently reviewed comprehensively  
75 (6). Carcinoembryonic antigen-related cell adhesion molecules (CEACAMs) are immuno-  
76 regulatory surface receptors that are able to modulate the activity of a number of important immune  
77 receptors, including pattern recognition receptors Toll-like receptor 2 (TLR2) and TLR4 (7-11).

78 Three members of the CEACAM receptor family that recognize *C. albicans* surface  
79 structures are co-expressed on human neutrophils: CEACAM1, CEACAM3, and CEACAM6 (12,  
80 13). The neutrophil marker CEACAM8 (CD66b) does not bind to *C. albicans* (12). While the  
81 extracellular domains of CEACAM receptors are composed of highly conserved Ig-like domains,  
82 their signaling properties differ widely (11, 14) and can be activating or inhibitory. CEACAM1 is  
83 also expressed on various other leukocytes and epithelial cell types (11, 15). The cytoplasmic  
84 domain of CEACAM1 bears an immunoreceptor tyrosine-based inhibition motif (ITIM) and  
85 recruits Src family kinases and SHP1 and SHP2 phosphatases. Importantly, it can act as both, an  
86 activating or an inhibiting receptor (8, 10, 12, 16-19) and delays apoptosis in granulocytes and

87 lymphocytes (20-22). CEACAM3 is exclusively found on granulocytes and acts as an activating  
88 receptor via sign its immunoreceptor tyrosine-based activation motif (ITAM) upon ligation by  
89 bacterial pathogens (23, 24). CEACAM6 is GPI-anchored and constitutively localized to  
90 membrane microdomains (14). The modulatory roles of CEACAM1, CEACAM3, and CEACAM6  
91 in cellular responses to bacterial pathogens were recently analyzed in detail (8, 25-32). In  
92 particular, a comprehensive study on the CEACAM-specific neutrophil responses to *Neisseria*  
93 *gonorrhoeae* in humanized murine neutrophil cell models shows that CEACAM3 mainly mediates  
94 neutrophil activation and bacterial killing, while CEACAM1 and CEACAM6 mostly mediate  
95 pathogen binding and phagocytosis (28). Interestingly, this study also demonstrates that the co-  
96 expression of CEACAM1 and CEACAM6 potentiate, rather than hinder, CEACAM3-dependent  
97 responses of neutrophils to the bacterial pathogen (28). Similar results were obtained for  
98 *Helicobacter pylori* in murine neutrophils from humanized transgenic mice, where human  
99 CEACAM1 expression was sufficient for the binding and the phagocytosis of this pathogen, but  
100 an increased ROS production and an enhanced CCL3 secretion was only found in human  
101 CEACAM3/CEACAM6-expressing neutrophils, independent of the additional presence of human  
102 CEACAM1 (31). However, other studies using neutrophils from *Ceacam1*<sup>-/-</sup> mice describe  
103 CEACAM1 as an important inhibitory receptor that negatively controls granulopoiesis as well as  
104 the LPS-induced IL-1 $\beta$  and ROS production in neutrophils (10, 33). The same mice were used in  
105 a study demonstrating the CEACAM1-mediated negative regulation of MMP9 release by mouse  
106 neutrophils (12). Also, in mouse monocytes the secretion of IL-6 in response to LPS is regulated  
107 by CEACAM1 (34). In human monocytes, CEACAM1 ligation by a peptide mimicking bacterial  
108 pathogen binding affects the differentiation into a more pro-inflammatory phenotype resulting in  
109 the secretion of high levels of interleukin-1 receptor antagonist and CXCL8 (35).

110 In the present study, we used CEACAM mono-specific monoclonal antibodies to ligate  
111 CEACAM1, CEACAM3 and CEACAM6, respectively, on human neutrophils to analyze their  
112 effects on *C. albicans*-induced responses. Recent studies that used different monoclonal antibodies  
113 against CEACAM receptors in the absence of pathogens demonstrate that the ligation of either  
114 CEACAM on neutrophils resulted in signaling events, priming, and also an enhanced  $\beta$ 2-integrin-  
115 dependent adhesion to endothelial cells (36, 37). We assessed in the present study, whether  
116 neutrophil treatment with various CEACAM-specific antibodies alters different aspects of the  
117 immediate response (30-120 min) of human neutrophils to *C. albicans*, including CXCL8  
118 degranulation, ROS production, and transcriptional responses. Moreover, systems biological  
119 analysis of the neutrophil transcriptional responses to the CEACAM-specific antibodies in  
120 presence or absence of *C. albicans* revealed affected cellular functions that were verified for their  
121 long-term (4-24 h) biological effects *in vitro*, like apoptosis and the *de novo* production of IL-6 and  
122 IL-1 $\beta$ .

123  
124 **Results:**  
125 **Increased *C. albicans*-induced CXCL8 release by neutrophil pretreatment with anti-**  
126 **CEACAM6 antibody.** In order to establish an easy read-out for the activation of human  
127 neutrophils by *C. albicans*, we first ascertained that this stimulation resulted in the early  
128 degranulation of CXCL8 (also known as IL-8; Fig 1A). Indeed, stimulation with this fungal  
129 pathogen resulted in the rapid secretion of approximately 600 pg CXCL8/ml within 2h (10<sup>7</sup>

130 neutrophils/ml). Pretreatment with the mouse IgG1 isotype control antibody MOPC-21 did not  
131 alter CXCL8 release in response to *C. albicans* (Fig. 1A). We then used different mouse  
132 monoclonal IgG1 antibodies either monospecific for CEACAM1, CEACAM3, and CEACAM6, or  
133 cross-reactive to more than one CEACAM receptor (as indicated in Fig. 1B) for neutrophil ligation  
134 before *C. albicans* stimulation. Treatment with the CEACAM6-specific monoclonal antibody 1H7-  
135 4B resulted in a strong and significant increase in CXCL8 release upon stimulation with  
136 *C. albicans*. One CEACAM1-specific antibody (B3-17) also displayed a considerable increase of  
137 CXCL8 release in presence of *C. albicans*, but results from B3-17 treatments did not reach  
138 statistical significance due to the high donor-specific variance for the CXCL8 responses.  
139 CEACAM6 ligation with 13H10 antibody increased CXCL8 secretion slightly but not statistically  
140 significant, while a recombinant CEACAM6-Fc protein did not show any effect on CXCL8  
141 secretion. CEACAM3 ligation with monospecific 308/3-3 did not significantly alter the CXCL8  
142 response to *C. albicans* stimulation, while a slight but not significant increase was detected when  
143 monoclonal antibody 18/20 was used that also binds to CEACAM1.

144 Figure 1C highlights the CXCL8 responses in neutrophil cell culture supernatants from the  
145 same donors treated with isotype, B3-17, or 1H7-4B from Figure 1B, respectively. Here,  
146 differentially treated samples from the same donor are connected by lines. As depicted, B3-17  
147 treatment always resulted in a small increase of the CXCL8 release compared to the isotype  
148 treatment, and 1H7-4B treatment resulted in a strong increase (up to 10-fold) of CXCL8 release,  
149 illustrating the donor-independent relative effect of the different antibodies. In absence of  
150 *C. albicans* stimulation, no significant CXCL8 secretion or major differences after any antibody  
151 treatment were found (Fig. 1D). However, the three most effective antibodies in the presence of  
152 *C. albicans* (B3-17, 1H7-4B and 13H10) also resulted in a minor increase (2-fold) of CXCL8  
153 secretion in some neutrophil preparations when used alone in the absence of *C. albicans*. The  
154 differences in CXCL8 concentrations between antibody treatment without *C. albicans* stimulation  
155 (30-170 pg/ml), and antibody treatment with *C. albicans* stimulation (400-11,000 pg/ml) ranged  
156 between one and two orders of magnitude, depending on the donor. The high variation in the release  
157 of CXCL8 and other cytokines by neutrophils from different donors are also found in other studies  
158 using different stimuli, including the CD11b/CD18 ligand Thy-1, LPS, and fMLP, and many  
159 studies therefore give the standard error instead of the standard deviation (38-41). For the following  
160 experiments, the CEACAM1-specific antibody B3-17 (“CC1”), the CEACAM3-specific antibody  
161 308/3-3 (“CC3”), and the CEACAM6-specific antibody 1H7-4B (“CC6”) were chosen for further  
162 investigation.

163 **No influence of anti-CEACAM antibodies on neutrophil-mediated killing of**  
164 ***C. albicans*.** We next analyzed the influence of the three CEACAM1/3/6-targeting antibodies on  
165 different cellular functions elicited directly upon the engagement of the neutrophil by the fungal  
166 pathogen. First, we tested if the antibodies affected *C. albicans* binding to neutrophil cell surfaces  
167 (Fig. 2A). In accordance with our findings that the CEACAM family receptors are not critical for  
168 *C. albicans* adhesion to different epithelial cell lines (12) and CEACAM1-transgenic mouse  
169 neutrophils (42), neutrophil binding to fungal cells was not affected by antibody-mediated  
170 CEACAM ligation in two different donors (Fig. 2A). A major killing mechanism employed by  
171 neutrophils is the oxidative burst. We therefore tested the production of reactive oxygen species  
172 (ROS) under the different antibody treatments in the presence or absence of *C. albicans* stimulation

173 (Fig. 2B). While ROS production by *C. albicans* stimulation was clearly detected in two different  
174 donors, none of the three antibodies used for ligation changed the basic ROS levels in absence of  
175 *C. albicans* nor the *C. albicans*-induced ROS levels after infection (Fig. 2B). To test for effects of  
176 the antibody treatments on the overall efficiency of fungal killing by the neutrophils, we next  
177 analyzed the number of surviving fungal cells after 30 min co-incubation with the neutrophils.  
178 None of the tested CEACAM1-, CEACAM3- or CEACAM6-specific monoclonal antibodies  
179 showed a detectable effect on neutrophil killing efficiency (Fig. 2C).

180 **The *C. albicans*-induced transcriptional response in neutrophils is differentially**  
181 **enhanced by the ligation of CEACAM1/3/6-directed antibodies.** CEACAM receptor ligation by  
182 various antibodies results in neutrophil priming and enhanced binding to endothelial cells (36, 37).  
183 Therefore, we next examined if antibody-mediated CEACAM ligation on neutrophil surfaces with  
184 B3-17 (“CC1”), 308/3-3 (“CC3”), and 1H7-4B (“CC6”) would also affect neutrophil  
185 transcriptional responses in the presence or absence of *C. albicans* stimulation. Indeed, CEACAM  
186 ligation with the monospecific antibodies in the presence and in the absence of *C. albicans*  
187 stimulation affected transcriptional responses. Principal component analyses (PCA, Figs. 3A, S1A)  
188 demonstrated that the different antibody treatments in the presence or the absence of *C. albicans*  
189 stimulation were well separated and that the data had a good quality. Principal component analysis  
190 (PCA, Fig. 3A) revealed that CC6 treatment had the largest influence on the neutrophil  
191 transcriptomic response induced by *C. albicans*, followed by CC1 treatment. CC3 treatment before  
192 *C. albicans* infection only resulted in minor alterations in gene transcription. The three antibodies  
193 displayed similar hierarchies in absence of *C. albicans* stimulation (Fig S1A).

194 We first analyzed the transcriptional response induced by *C. albicans* stimulation. IgG  
195 treatment with subsequent *C. albicans* stimulation of neutrophils resulted in 436 significantly  
196 differentially expressed genes (DEGs) compared to IgG treatment in absence of *C. albicans*  
197 stimulation: 207 DEGs were up-regulated and 229 were down-regulated (fold-change  $>\pm 2$ ,  
198 adjusted p-value  $<0.05$ ; see Table S1 for details). We then investigated significant differences in  
199 the gene expression after *C. albicans* stimulation induced by the pre-treatment with the different  
200 anti-CEACAM antibodies, respectively. Anti-CEACAM1 treatment in presence of *C. albicans*  
201 stimulation resulted in 37 DEGs compared to IgG treatment in presence of *C. albicans* stimulation,  
202 with 36 upregulated genes and 1 downregulated gene (Table S1). Anti-CEACAM6/*C. albicans*  
203 treatment caused 122 DEGs compared to IgG/*C. albicans* treatment, with 105 upregulated and 17  
204 downregulated genes (Table S1). Systems biology analysis showed that 39 of the upregulated genes  
205 were synergistically co-regulated by *C. albicans*. In contrast, anti-CEACAM3/*C. albicans*  
206 treatment led to the differential expression of only 4 genes compared to the IgG/*C. albicans*  
207 treatment (Table S1). Figure 3B displays the comparison of the DEGs induced by the three  
208 CEACAM-specific antibodies with *C. albicans* stimulation, respectively. All DEGs used for the  
209 calculation of Fig. 3B and their affiliation with the respective partitions of the Venn diagram are  
210 listed in Table S3. The four genes increased by anti-CEACAM3/*C. albicans* treatment were also  
211 upregulated by anti-CEACAM1/*C. albicans* and anti-CEACAM6/*C. albicans* treatment. Anti-  
212 CEACAM1/*C. albicans* treatment also shared the majority of regulated genes with anti-  
213 CEACAM6/*C. albicans* treatment (26 of 37 DEGs). 92 of the DEGs induced by anti-  
214 CEACAM6/*C. albicans* treatment were unique to this treatment.

215 We then compared DEGs induced by CEACAM1 ligation with the B3-17 antibody in  
216 presence of *C. albicans* stimulation (Table S1) with the effect of the CEACAM1 antibody alone  
217 (without *C. albicans* stimulation, Table S2). DEGs not shared by both groups (Fig 3 C, Table S4)  
218 were analyzed for significantly enriched Gene Ontology (GO) categories. Please note that only  
219 protein-coding genes are annotated in the GO database. Differences between to the numbers given  
220 in Figures 3C (and 3D, see below) are due to non-protein coding transcripts that were included in  
221 the Venn diagram. Within the 15 protein-coding DEGs only found in the treatment by anti-  
222 CEACAM1 antibody alone (Fig. 3C, CC1), no GO category was significantly enriched. Of the 16  
223 protein-coding DEGs only found in the anti-CEACAM1 antibody treatment with *C. albicans*  
224 stimulation (Fig. 3C, CC1+Ca), seven were annotated to be involved in the significantly enriched  
225 GO category “positive regulation of protein phosphorylation”. A similar comparison of anti-  
226 CEACAM6 antibody treatment in absence and presence of *C. albicans* stimulation (Fig. 3D, Table  
227 S5) revealed the following significantly enriched GO categories. Within the 60 protein-coding  
228 DEGs induced by anti-CEACAM6 antibody alone, 12 were annotated to be involved in “leukocyte  
229 activation”, 14 were annotated to the “cellular response to cytokine stimulus”, and 17 to the  
230 “regulation of immune system process”. Of the 34 protein-coding DEGs only induced by anti-  
231 CEACAM6 antibody with subsequent *C. albicans* stimulation, four were annotated to the “the  
232 regulation of TLR-responses”, four to “ROS metabolic processes” and 13 to the “positive  
233 regulation of gene expression”. These data suggest that CEACAM1 ligation and in particular  
234 CEACAM6 ligation are likely able to influence important long-term neutrophil functions in  
235 response to *C. albicans*.

236 A comparison of the genes induced by the respective anti-CEACAM antibodies alone  
237 (without *C. albicans* stimulation, Fig. 3E, Table S6) revealed that anti-CEACAM3 treatment  
238 shared four of its five upregulated genes with both, anti-CEACAM1 and anti-CEACAM6  
239 treatments, and the fifth gene only with anti-CEACAM1 treatment. Also, anti-CEACAM1  
240 antibody treatment shared the majority of DEGs with anti-CEACAM6 antibody treatment (29) and  
241 displayed only 5 unique DEGs. Anti-CEACAM6 antibody treatment resulted in 117 unique DEGs  
242 (Fig. 3E, Table S6).

243 GO enrichment analysis of all differentially regulated genes by anti-CEACAM6 antibody  
244 treatment in presence of *C. albicans* (Table S1) revealed that many are implicated in the regulation  
245 of major neutrophil functions. Selected functions are represented in the heatmaps shown in Fig. 4,  
246 highlighting the differences in transcriptomic responses elicited by the different CEACAM ligating  
247 antibodies. Significantly enriched GO categories after CEACAM6/ *C. albicans* treatment included  
248 cell adhesion/migration, cytokine production, secretion, and the cellular responses to cytokines.  
249 Importantly, also genes of proteins annotated to programmed cell death were enriched after  
250 CEACAM6 ligation and *C. albicans* stimulation (Fig. 4). A similar analysis of DEGs induced by  
251 anti-CEACAM1 antibody treatment in presence of *C. albicans* (Fig. S1B) revealed the enrichment  
252 of some, but not all cellular functions found enriched after anti-CEACAM6/*C. albicans* treatment.  
253 This was expected from the partial overlap between the DEGs found in both treatments (Fig. 3B).  
254 Apoptosis was not among the enriched functions.

255 **Integrated network analysis and dynamic models predict the modulation of**  
256 ***C. albicans*-induced apoptosis by anti-CEACAM6 antibody treatment.** The gene expression  
257 data sets further allowed a systems biological analysis of the signaling events involved. Since anti-

258 CEACAM6 treatment had the most profound influence on the neutrophil transcriptional response  
259 in the presence of *C. albicans* stimulation, we further analyzed the cellular functions affected in  
260 dynamic models, and signaling pathways likely leading to these alterations in the cellular functions  
261 (Figs. 5, 6). We considered signaling cascades triggered from the CEACAM6 ligation via direct  
262 protein-protein interactions as well as downstream pathways and functions induced subsequently  
263 according to the CEACAM6-specific transcriptional response (detailed procedures are given in the  
264 Methods section).

265 Thus, for CEACAM6 treatment in the presence of *C. albicans* stimulation, the integrated  
266 network analysis identified an optimally responsive network module of 136 genes with 174  
267 interactions (Fig. 5). The network module comprised many key players in apoptosis and NF-kappa  
268 B (NFκB) signaling, also reflected by the highly significant enrichment of KEGG pathways related  
269 to these and other functions (Fig. 5, Table S7). The KEGG pathways overlapped to some degree,  
270 since many signaling molecules are shared by different pathways. Central to the regulation of  
271 apoptosis and cytokine production are molecules of the NFκB complex and associated signaling  
272 partners, as illustrated in Fig. 5, displaying the overlapping pathways. Interestingly, also the  
273 regulation of TLR signaling was significantly enriched by CEACAM6 treatment (Table S7). So  
274 far, only for CEACAM1 and CEACAM3 experimental evidence is available for the regulation of  
275 these important pattern recognition receptors (8-10, 24, 43), which can recognize both, bacterial  
276 and fungal pathogens (44).

277 Dynamical network analysis of transcriptional data from the CEACAM6-treated  
278 neutrophils in the presence of *C. albicans* distinguished key players annotated to cellular functions  
279 according to the Gene Ontology (GO) data base that were induced by the CEACAM6 ligation (Fig.  
280 6). The cell function-centered network analysis verified that both, the regulation of cytokine  
281 production and the regulation of apoptosis were among the most significantly enriched cellular  
282 functions (Fig. 6, Table S8). Also, the regulation of cytokine production, cell migration, and other  
283 basic functions important for the execution of neutrophil responses, including the regulation of  
284 TLR signaling, were strongly enriched (Fig. 6, Table S8). Moreover, dynamical simulations based  
285 on the transcriptomic data predicted the activation of caspase-8 (CASP8) and CASP1, two  
286 molecules recognized as central switches for apoptosis (45, 46), by anti-CEACAM6 treatment in  
287 presence of *C. albicans* stimulation, but not by CEACAM1/*C. albicans* treatment (Fig. S2). The  
288 same dynamical simulations also predict an undulating behavior of the *IL6* response with a delayed  
289 activity from the first impulse given by the pathogen stimulus. Thus, the predictions by the cell  
290 function-centered network analysis are in agreement with the projections of the pathway-centered  
291 integrated network analysis.

292 **Verification of the biological significance of predicted alterations of neutrophil**  
293 **functions.** Taken together, the different bioinformatic approaches identified programmed cell  
294 death/apoptosis as one of the cellular functions most dominantly affected by CEACAM6  
295 treatment in presence of *C. albicans* stimulation (DEGs are listed in Table S1; details for  
296 bioinformatics are given in the Methods section). None of the other antibody treatments either in  
297 the presence or in the absence of stimulation by *C. albicans* resulted in the enrichment of this  
298 feature, indicating a specificity for CEACAM6 to regulate *C. albicans*-induced apoptosis. In  
299 contrast, the induction of the production of several cytokines was modulated by antibody  
300 treatment against the three CEACAM receptors alone, as well as in presence of *C. albicans*

301 stimulation (Tables S1, S2). Also, the bioinformatic approaches predicted cytokine production  
302 and associated pathways to be modulated after CEACAM1 and CEACAM6 treatment (Figs. 5, 6,  
303 S1C, Tables S7, S8.). We therefore analyzed the neutrophil apoptosis and the production of the  
304 pro-inflammatory cytokine interleukin-1 $\beta$  (IL-1 $\beta$ ) in detail in long-term experiments.

305 As just mentioned, the significant enrichment of DEGs with gene products annotated to be  
306 linked to the regulation and execution of programmed cell death was only found by GO enrichment  
307 analysis, pathway network analysis (Fig 4) and functional network analysis (Fig.5) for anti-  
308 CEACAM6 treatment in presence of *C. albicans* stimulation. *In vitro* experiments with CEACAM  
309 ligation and *C. albicans* stimulation completely supported these predictions (Fig. 7). CEACAM6  
310 ligation with the monoclonal antibody 1H7-4B was enhanced the *C. albicans*-induced apoptosis of  
311 human neutrophils, while none of the antibody treatments targeting CEACAM1 or CEACAM3  
312 altered the neutrophil apoptosis (Fig. 7A, B). Moreover, neither the anti-CEACAM6 antibody nor  
313 the anti-CEACAM1 and anti-CEACAM3 antibodies affected the spontaneous apoptosis (without  
314 *C. albicans* stimulation) of the neutrophils after 4 h and after 24 h, respectively (Fig. 7C, D).

315 For the predicted cytokine production, a more complex situation presented itself in the  
316 bioinformatic analyses as well as by a simple look at the transcriptional data. Network analyses  
317 and GO enrichment predicted a general NF $\kappa$ B-dependent enhancing influence of both, CEACAM1  
318 and CEACAM6, on the production of cytokines and on the cellular response to the cytokines (Figs.  
319 3, 4, 5). Both effects can influence the sensor and effector functions of the neutrophils, putatively  
320 altering the long-term cytokine *de novo* synthesis and release. We chose the important pro-  
321 inflammatory cytokine IL-1 $\beta$  for the verification of the prediction model derived from the  
322 transcriptomic data set.

323 Transcription of the *IL1B* gene was only moderately induced by *C. albicans* stimulation of  
324 human neutrophils at 2 h and also moderately enhanced by CEACAM1 treatment with and without  
325 *C. albicans* stimulation (Fig.8A). CEACAM3 treatment had no significant impact on the *IL1B* gene  
326 expression at 2 h, while CEACAM6 treatment enhanced the *IL1B* expression in the presence and  
327 the absence of *C. albicans* (Fig.8A). When we analyzed the secretion of IL-1 $\beta$  protein into the cell  
328 culture supernatants after 21 h (Fig. 8B, C), we found that *C. albicans* stimulation indeed increased  
329 the total release of IL-1 $\beta$  from 5.7  $\pm$ 1.5 pg/ml (“Untreated”, Fig. 8B) to 40.0  $\pm$ 12.4 pg/ml  
330 (“Untreated +*C. albicans*”, Fig 8C). However, in contrast to the CEACAM1 treatment-evoked  
331 increase in the *IL1B* transcripts, it did not result in detectable differences compared to isotype-  
332 treated neutrophils neither in the presence nor absence of *C. albicans* stimulation (Fig. 8B, C).  
333 Interestingly, CEACAM3 treatment led to a significant increase in IL-1 $\beta$  secretion with or without  
334 *C. albicans* stimulation, despite the unaltered *IL1B* transcription levels after 2 h (Fig. 8B, C).  
335 Concordant with the transcriptional response, CEACAM6 treatment resulted in a significant  
336 increase in IL-1 $\beta$  secretion in the presence of *C. albicans* stimulation at 21 h (Fig. 8C). In the  
337 absence of the fungal pathogen IL-1 $\beta$  levels were moderately but not significantly enhanced at 21  
338 h (Fig. 8C).

339 The CEACAM3 ligation-induced IL-1 $\beta$  production, despite the lack of a detectable increase  
340 in the transcriptional activity after 2 h, led us to reinvestigate our network analysis. The sub-  
341 network analysis revealed a possible interaction between *IL6* and the subsequent induction of *IL1B*  
342 (Fig. 9A). Importantly, the regulation goes both ways, i.e., IL-1 $\beta$  is not only able to induce IL-6,  
343 but it can, *vice versa*, also be induced by IL-6. However, in contrast to the well-known “direct”



344 induction of IL-6 via IL-1 $\beta$ , there were at least 4 nodes between *IL6* and *IL1B* (Fig. 9A). Still, *IL6*  
345 was among the few genes upregulated by CEACAM3 treatment (Fig. 9B). *IL6* was actually  
346 significantly upregulated by all three anti-CEACAM antibodies in the presence and in the absence  
347 of *C. albicans*, respectively, but IL-6 expression was not affected by *C. albicans* alone (Fig. 9B).  
348 However, in untreated and isotype-treated neutrophils hardly any *IL6* transcripts were detected by  
349 sequencing. The normalized counts of the *IL6* transcripts were between 0 and 3 in the presence and  
350 the absence of *C. albicans* stimulation in untreated neutrophils, and also in isotype-treated  
351 neutrophils. Normalized counts in all CEACAM treatment groups with or without *C. albicans*  
352 stimulation were in the range between 24 and 1447. Thus, very few transcripts serve neutrophils  
353 for the *de novo* synthesis of this pro-inflammatory cytokine.

354 To analyze if these few transcripts are translated into detectable protein levels and secreted  
355 after contact with *C. albicans*, we measured IL-6 levels in neutrophil supernatants after 21 h of  
356 infection (Fig. 9C, D). The lack of transcriptional *IL6* expression and induction by *C. albicans* was  
357 verified *in vitro* via ELISA, where  $3.7\pm 1.7$  pg/ml IL-6 were produced by untreated neutrophils in  
358 the absence, and  $4.5\pm 1.2$  pg/ml IL-6 in the presence of *C. albicans* (Fig. 9C and D, respectively;  
359  $10^7$  neutrophils/ml). As predicted, CEACAM3 treatment significantly enhanced the IL-6 secretion  
360 in the absence and the presence of *C. albicans*, respectively (Fig. 9C, D). Also, CEACAM6  
361 treatment augmented the IL-6 release with and without *C. albicans* stimulations slightly but  
362 significantly (Fig. 9C, D). CEACAM1 treatment only resulted in minor, non-significant increases  
363 in IL-6 secretion, both, in presence and in absence of *C. albicans* stimulation (Fig. 9C, D), despite  
364 a strong transcriptional induction at 2 h.

365  
366 **Discussion**

367 Here, we show for the first time that CEACAM receptors expressed on human neutrophils  
368 influence the human neutrophil response to *C. albicans*. CEACAM6 ligation of human neutrophils  
369 in the presence of *C. albicans* stimulation enhanced the early release of CXCL8 and altered the  
370 neutrophil transcriptional responses. Different bioinformatic approaches (transcriptome analysis,  
371 network analysis and dynamical modelling of the involved response) then led to the identification  
372 of long-term neutrophil responses modulated by the CEACAM6-treatment in *C. albicans*-  
373 stimulated neutrophils, i.e., *C. albicans*-induced apoptosis and IL-6/IL-1 $\beta$  *de novo* synthesis.

374 It was surprising to find that the degranulation of CXCL8 and the global transcriptional  
375 response after 2 h of *C. albicans*-stimulation were enhanced by the antibody-mediated ligation of  
376 CEACAM1 (by B3-17) and CEACAM6 (by 1H7-4B), but not of CEACAM3 (by 308/3-3). On  
377 neutrophils, CEACAM3 is recognized as the central CEACAM family receptor leading to  
378 neutrophil activation by bacteria, and the subsequent phagocytosis and bacterial killing due to an  
379 ITAM in its cytoplasmic tail (23-25, 28, 47-51). Despite the dominance of CEACAM3 in the  
380 human neutrophil responses to pathogenic bacteria, both, CEACAM1 and CEACAM6, can also  
381 mediate binding and phagocytosis of bacterial pathogens in neutrophils and in other cell types (28,  
382 51, 52). In epithelial cells, CEACAM1 induces either inhibitory or activating effects on their  
383 immune responses; e.g., in lung epithelial cells, CEACAM1 dampens TLR2-mediated responses  
384 (8, 18), while it is critical for the pathogen-induced CXCL8 release in gastric and intestinal cell  
385 lines (12, 17).

386 In accordance with our findings in epithelial cells (12, 17), CEACAM1 ligation with B3-  
387 17 antibody mostly induced activating functions within the immediate neutrophil response to  
388 *C. albicans*, e.g., enhancing the CXCL8 degranulation. Interestingly, the long-term response of the  
389 neutrophils seemed rather dampened by CEACAM1 ligation, since the two important pro-  
390 inflammatory cytokines IL-6 and IL-1 $\beta$  were not enhanced in the CEACAM1 treated neutrophils  
391 in the presence and the absence of *C. albicans* stimulation, respectively. It is likely that the  
392 CEACAM1 negative regulation on IL-6 and IL-1 $\beta$  secretion takes place at some point after the  
393 increased transcription of these two cytokines, since the *IL1B* and the *IL6* gene transcription was  
394 significantly upregulated by CC1 treatment. The precursor of IL-1 $\beta$  is biologically inactive and  
395 requires proteolytic cleavage into biologically active mature cytokines, controlled by the  
396 inflammasome-mediated caspase-1 activation (53). Hence, a two-step model has been proposed for  
397 IL-1 $\beta$  production: first, activation of PRRs on host cells induce enhanced synthesis of pro-IL-1 $\beta$ ;  
398 second, activation of the inflammasome by PAMPs results in the posttranslational cleavage of the  
399 pro-cytokine into mature IL-1 $\beta$  (54). It is thus possible for CEACAM1 to influence the  
400 transcription of *IL1B* on the one side, and on the other inhibit the release of the active cytokine by  
401 inhibition of the subsequent processing steps. In fact, in mouse neutrophils, CEACAM1 negatively  
402 regulates the LPS-induced IL-1 $\beta$  production by blocking caspase-1 activation (10). Also the  
403 function of another essential receptor on mouse neutrophils, granulocyte-stimulating growth factor  
404 receptor, is inhibited by CEACAM1, resulting in a reduced granulopoiesis (33). And on mouse  
405 monocytes, CEACAM1 can negatively regulate IL-6 production (34). These dampening effects of  
406 CEACAM1 on the mouse myeloid responses enhanced the susceptibility of mice to bacterial  
407 pathogens and LPS challenge *in vivo* (33, 34). It should also be noted that not all specific antibodies  
408 used in this study evoked the same effects or affected neutrophil functionality to variable magnitude  
409 when CEACAM1, CEACAM3 or CEACAM6 were ligated. Different antibodies to CEACAM1  
410 can either enhance or block CEACAM1-mediated adhesion in trans and thereby can modulate the  
411 dimerization status of CEACAM1 or intracellular binding of SHP1 and SHP2 phosphatases and  
412 Src-like kinases to the CEACAM1-long cytoplasmic domain (55). Furthermore, it is well  
413 established that CEACAM1 ligation on epithelial cells can transduce inhibitory or activating cell  
414 signaling events dependent on the cellular status or context of the same cell (56). Taken together,  
415 our data disclose different roles for CEACAM1 ligation in the immediate neutrophil response to  
416 *C. albicans* (enhanced CXCL8 degranulation, altered transcriptional responses), and in the long-  
417 term response to *C. albicans* (inhibition of further pro-inflammatory signals in form of IL-1 $\beta$   
418 secretion), the latter being similar to CEACAM1-mediated regulation of neutrophil responses to  
419 bacterial pathogens.

420 CEACAM3 also played a dualistic role in the neutrophil responses to *C. albicans*. While  
421 there were no alterations upon CEACAM3 ligation in the immediate neutrophil responses (CXCL8  
422 release, binding, fungal killing), and only four genes were significantly upregulated after 2 h of  
423 *C. albicans* stimulation, CC3 treatment resulted in the highest concentrations of IL-1 $\beta$  and IL-6  
424 after 21 h incubation of all treatment groups. Thereby, CEACAM3 ligation showed the highest  
425 potential of increasing local inflammation with all its cytotoxic side effects (2, 4). Interestingly,  
426 based on the transcriptional responses obtained 2 h post-infection, IL-6 production preceded IL-1 $\beta$   
427 production. Sub-network analysis revealed a potential induction of IL-1 $\beta$  by increased IL-6 levels  
428 via several pathways with four or more nodes in between the two cytokines. The majority of these

429 pathways leading from IL-6 to IL-1 $\beta$  activation included the intermediate step of either CXCL8 or  
430 CCL20 production. Taken together, the role of CEACAM3 in the regulation of neutrophil  
431 responses to the fungal pathogen studied here and to various bacterial pathogens discussed earlier,  
432 differs widely: CEACAM3 has a major activating effect on the immediate response to the bacterial  
433 pathogens, but regulates rather long-term events affecting and enhancing the overall inflammatory  
434 response in *C. albicans* infection.

435 Network analysis and systems biological modelling were done here to get a first systems  
436 view on succession of events in the CEACAM receptor networks and their connection to apoptosis,  
437 inflammation and chemokine production. Integrated network analysis is capable of detecting  
438 signals beyond the scope of classical pathway analysis as it integrates the semantic of an interaction  
439 network. It is not confined to pre-established (known) pathways but rather includes the entire  
440 interaction network and thus has the power to also disentangle complex receptor pathway cross  
441 stimulation (57). Subsequent pathway enrichment then allows to functionally characterize the  
442 module and can further elucidate the intricate structure of complex pathways. Predictions from the  
443 comprehensive bioinformatic approaches used in this study on the unique behavior of CEACAM1,  
444 CEACAM3, and CEACAM6 (see discussion below) in *C. albicans*-stimulated neutrophils over  
445 time fit well to the *in vitro* data presented.

446 For CEACAM6 ligation, all three bioinformatic approaches consistently predicted an  
447 influence on the *C. albicans*-induced apoptosis. In contrast, no such prediction arose for  
448 CEACAM1 ligation. This was rather surprising, since our earlier publication shows that in rat  
449 granulocytes, CEACAM1 delays the spontaneous and the FAS ligand-mediated apoptosis (20),  
450 while on lung epithelial and colorectal cancer cells, CEACAM1 supports apoptosis (58, 59). In the  
451 experimental set-up used here, only CEACAM6 ligation in presence of *Candida*-stimulation lead to  
452 an enhanced apoptosis. All other treatments did not alter survival of the neutrophils compared to  
453 untreated neutrophils in presence or absence of *C. albicans* stimulation, respectively. So far, most  
454 studies show that CEACAM6 mostly decreases apoptosis and anoikis (apoptosis induced by the  
455 lack of adhesion) in various cancer cells and in primary epithelial cells (60-66). Interestingly, one  
456 study on acute lymphoblastic leukemia also demonstrates an increase in apoptosis via antibody-  
457 mediated ligation of CEACAM6 (67).

458 The CEACAM6-induced *de novo* production of IL-1 $\beta$  and IL-6 also was in accordance with  
459 the transcriptional analysis and the bioinformatic predictions. An increase of CEACAM6  
460 expression on epithelial cells and leukocytes is induced by various pathogens and pro-inflammatory  
461 cytokines (12, 68-71) and is thus generally associated with inflammatory events. CEACAM6  
462 interaction on ileal mucosa with adherent-invasive *E. coli* (AIEC), bacterial pathogens associated  
463 with Crohn disease (CD), results in an enhanced inflammation *in vivo*, both, in CD patients and in  
464 a CD mouse model using CEABAC10 transgenic mice (71, 72). Further, CEACAM6-AIEC  
465 interaction also enhances cytokine production in mucosal cells *in vitro* (68, 71). On neutrophils,  
466 increased CEACAM6 expression levels are correlated with asthma severity (73). The latter study  
467 proposes the presence of an altered neutrophil phenotype in presence of increased CEACAM6  
468 expression. To our knowledge, this is the first study showing that CEACAM6 ligation enhances  
469 neutrophil cytokine production. Our experiments also likely underestimated the levels of IL-1 $\beta$  and  
470 IL-6 produced per neutrophil upon anti-CEACAM6 treatment with the 1H7-4B antibody during

471 *C. albicans* infection, since the same treatment also led to an increase in apoptosis, thereby  
472 reducing the numbers of neutrophils contributing to the cytokine levels.

473 However, neutrophils co-express not only CEACAM1, CEACAM3 and CEACAM6, but  
474 also CEACAM8 and CEACAM4. Of these, the former three are likely co-stimulated by  
475 *C. albicans*. Furthermore CEACAM receptors are able to modulate the functions of other members  
476 of the CEACAM family (37). Therefore, further experiments will be necessary to determine the  
477 exact roles of the single CEACAM family members during neutrophil responses to *C. albicans*,  
478 and whether one CEACAM receptor is dominant in the response to the pathogen. Since neutrophils  
479 are short-lived and therefore are not useful for the transfection with siRNA, ligation with antibodies  
480 remains the best accessible tool. Any CEACAM-monospecific or even cross-reacting antibody  
481 (mimicking co-ligation by the pathogen) has to be evaluated on its own and in the specific setting  
482 of the experiment, since targeting different epitopes on the same CEACAM receptor can either  
483 enhance or inhibit the receptor functions (55), and one antibody can elicit inhibitory or activating  
484 cell signaling events dependent on the cellular condition of the same cell (56). While neutrophils  
485 from transgenic mice expressing one or more human CEACAMs proved valuable for the  
486 determination of the role of CEACAM receptors in the neutrophil response to bacterial pathogens  
487 (28, 31, 48), our data obtained with *C. albicans* stimulated neutrophils from human CEACAM1-  
488 transgenic mice suggest that mouse neutrophils do not respond to the fungal pathogen in a  
489 CEACAM1-dependent manner. Since mice are inherently naïve for *C. albicans* infection, it is  
490 possible that some (co-)receptor or signaling protein important for the CEACAM-specific response  
491 to this human pathogen is lacking in the mouse neutrophils.

492 Taken together, the combination of transcriptome analysis, cytokine measurements and  
493 systems biological modelling in the present study revealed that antibody-mediated ligation of  
494 CEACAM1, CEACAM3, and CEACAM6 could elicit specific regulations of neutrophil responses,  
495 evoked by the fungal pathogen *C. albicans*. CEACAM1 ligation had an early activating effect on  
496 human neutrophils during *C. albicans* infection (CXCL8 release, transcriptome), but acted  
497 inhibitory on the long-term response (IL-1 $\beta$  secretion). CEACAM3 ligation had only minor early  
498 effects during *C. albicans* infection, but acted strongly pro-inflammatory in long-term experiments  
499 (IL-6 and IL-1 $\beta$  release). CEACAM6 ligation consistently displayed an activating activity in  
500 neutrophils in early (CXCL8 release, transcriptome) and long-term (IL-6 and IL-1 $\beta$  release)  
501 responses. Interestingly, CEACAM6 ligation also resulted in an enhanced *C. albicans*-induced  
502 apoptosis.

503

## 504 **Materials and Methods**

505 **Neutrophil isolation and treatments.** Human peripheral blood was collected from healthy  
506 volunteers with written informed consent. This study was conducted according to the principles  
507 expressed in the Declaration of Helsinki. The blood donation protocol and use of blood for this  
508 study were approved by the institutional ethics committee of the University Hospital Jena  
509 (permission number 5070-02/17). Neutrophils were isolated from peripheral blood using 1-Step  
510 Polymorphs (GENTAUR GmbH, Germany). In brief, 20 ml 1-Step Polymorphs were overlaid with  
511 20 ml blood and centrifuged at 500  $\times$  g for 35 min at room temperature with acceleration and  
512 deceleration set to “0”. The lower cell layer was collected, mixed with one volume of ice-cold

513 0,45% NaCl solution, and centrifuged at 4°C and 400 × g for 10 min. the pellet was suspended in  
514 5 ml ice-cold ACK lysis buffer. The reaction was stopped by adding 45 ml HBSS (GIBCO, Thermo  
515 Fisher Scientific, Germany). Centrifugation for pelleting and a further washing step using HBSS  
516 were performed at 4°C and 250 × g for 10 min. Purity >96% was determined by flow cytometry.  
517 Cells numbers were adjusted to 1×10<sup>7</sup> cells/ml in RPMI/10% FBS if not stated otherwise and  
518 experiments were performed immediately. Cells were either left untreated or treated with 10 µg/ml  
519 antibody (see below) for 45 min. Cells were then either left unstimulated or stimulated with  
520 *C. albicans* for 2 h at an MOI of 1 if not mentioned otherwise.

521 **Antibodies and recombinant CEACAM6-Fc.** All antibodies used were monoclonal mouse IgG1:  
522 MOPC-21 (Hoelzel Diagnostika GmbH, Germany; isotype control), B3-17 (anti-human  
523 CEACAM1, Singer, Essen, Germany), C5-1X/8/8 (anti-human CEACAM1, Singer, Essen,  
524 Germany), CC1/3/5-Sab (anti-human CEACAM1/3/5, LeukoCom, Essen, Germany), 18/20 (anti-  
525 human CEACAM1/3/5, Singer, Essen, Germany), 308/3-3 (anti-human CEACAM3/5, LeukoCom,  
526 Essen, Germany), 1H7-4B (anti-human CEACAM6, LeukoCom, Essen, Germany), 13H10 (anti-  
527 human CEACAM6, Genovac, Freiburg, Germany). Specificity of all antibodies was verified by  
528 FACS analysis using CHO or HELA cells transfected with human CEACAM1, CEACAM3,  
529 CEACAM6, CEACAM5, CEACAM8, or empty vector (negative control). Note that none of the  
530 antibodies cross-reacted to CEACAM8, and that 18/20, CC1/3/5-Sab, and 308/3-3 cross-reacted to  
531 CEACAM5 that is not expressed on neutrophils (therefore we refer to 308/3-3 as “CEACAM3-  
532 specific” in the context of this publication). Cross-reactivities to CEACAM1, CEACAM3, and  
533 CEACAM6 are given in Figure 1. Recombinant CEACAM6 protein consisting of the CEACAM6  
534 extracellular domain fused to the constant region of human IgG were produced in HEK-293 cells  
535 and purified via protein G columns (GE Healthcare, Munich, Germany) as described previously  
536 (74).

537 ***Candida albicans.*** *C. albicans* strain SC5314 was grown as described (75, 76). For experiments,  
538 YPD liquid cultures were inoculated with a single colony from YPD agar plates and grown at 30°C  
539 and 180-200 rpm for 14-16 h. Yeast cells were harvested, washed twice and suspended in a desired  
540 volume of ice-cold PBS. Yeast cells were counted in a Neubauer Improved chamber.

541 **ELISA** 1×10<sup>7</sup> neutrophils/ml in RPMI/10% FBS were either left untreated or treated with 10 µg/ml  
542 antibody for 45 min. Cells were then either left unstimulated or stimulated with *C. albicans* for 2  
543 h at an MOI of 1. Supernatants were harvested at the indicated time points and tested for CXCL8  
544 (BD Biosciences, Germany; sensitivity: 3 pg/ml), IL-6 (Abcam, Germany; sensitivity: 2 pg/ml)  
545 and/or IL-1β (sensitivity: 4 pg/ml) concentrations by ELISA (BD Biosciences, Germany).

546 **Binding analysis and ROS determination** Neutrophils were stained with anti-CD11b-PerCP-  
547 Vio700 (REA592, Milteyi Biotech, Germany; 5 µl for 4×10<sup>6</sup> neutrophils in 400 µl medium) for 45  
548 min. *C. albicans* cells were stained with Rabbit anti-*C. albicans* IgG (BP1006, Acris Antibodies,  
549 5 µl for 6×10<sup>7</sup> *C. albicans* cells in 200 µl medium) for 30 min, followed by Goat anti-Rabbit-  
550 AlexaFluor633 (Invitrogen, Sweden; 2 µl in 400 µl medium) for 30 min. 2×10<sup>5</sup> stained neutrophils  
551 in 200 µl RPMI/10% FBS were left untreated or treated with 10 µg/ml antibody and incubated for  
552 45 min at 37°C, 5% CO<sub>2</sub>. Neutrophils were left unstimulated or were stimulated with 1×10<sup>6</sup>  
553 *C. albicans* cells per well (MOI 5) and samples were incubated for 30 min at 37°C, 5% CO<sub>2</sub>. 10 µl  
554 of 0.5 µg/ml DHR (Sigma-Aldrich, Germany) working solution in 4% FBS/D-PBS (Gibco/Thermo  
555 Fisher Scientific, Germany) was added to each sample to reach a final concentration of 25 ng/ml,

556 and samples were incubated at 37°C, 5% CO<sub>2</sub> for 10 min. Samples were analyzed in an Attune  
557 flow cytometer (Invitrogen/ Thermo Fisher Scientific, Germany; BL1: DHR123/ROS, BL3:  
558 CD11b/neutrophils, RL1: *C. albicans*). For adjustments and compensation, separate single staining  
559 of samples for all channels was performed before the experiments. Relative fluorescence units of  
560 the DHR123/ROS signals were logarithmized for presentation.

561 **Killing assay.** In a 96 well plate, 2×10<sup>5</sup> neutrophils in 100 µl RPMI/10% FBS were left untreated  
562 or treated with 10 µg/ml antibody in duplicates and incubated for 45 min at 37°C, 5% CO<sub>2</sub>.  
563 Neutrophils were left unstimulated or were stimulated with 2×10<sup>5</sup> *C. albicans* cells per well (MOI  
564 1) and samples were incubated for 30 min at 37°C, 5% CO<sub>2</sub>. *C. albicans* solution for standards  
565 (input) was kept on ice for the incubation times. Just before the following procedures, *C. albicans*  
566 standards (sensitivity: 6,500 CFU) were transferred to the 96 well plate. Triton X-100 was added  
567 to all wells to reach a final concentration of 0,3% and incubated for 10 min at 37°C, 5% CO<sub>2</sub>, in  
568 order inactivate neutrophils. Viable *C. albicans* cells were quantified using the Colorimetric Cell  
569 Viability Kits III (XTT) from Promokine, Germany: 50 µl XTT reaction mixture was added per  
570 well and samples were incubated for further 3-4 h at 37°C, 5% CO<sub>2</sub>. Absorbance was measured  
571 using a TECAN M200 at 450 nm and 630 nm (background). For calculations of *C. albicans* CFUs,  
572 background and blanks were subtracted.

573 **Spontaneous and *C. albicans*-induced apoptosis.** 2×10<sup>5</sup> neutrophils in 200 µl RPMI/10% FBS  
574 were left untreated or treated with 10 µg/ml antibody in duplicates and incubated for 2 h at 37°C,  
575 5% CO<sub>2</sub>. Neutrophils were left unstimulated (spontaneous apoptosis) or were stimulated with  
576 2×10<sup>5</sup> *C. albicans* cells per well (MOI 1; *C. albicans*-induced apoptosis) and samples were  
577 incubated for 4 h or 24 h (unstimulated only) at 37°C, 5% CO<sub>2</sub>. Cells were stained with the Annexin  
578 V Detection Kit APC (eBioscience, Germany) and analyzed in an Attune flow cytometer  
579 (Invitrogen/ Thermo Fisher Scientific, Germany; BL2: propidium iodide, RL1: Annexin V-APC).  
580 Cells negative for PI and Annexin V were considered viable.

581 **RNA sequencing.** 1.2×10<sup>7</sup> neutrophils in 1.2 ml in RPMI/10% FBS were either left untreated or  
582 treated with 10 µg/ml antibody for 45 min. Cells were then either left unstimulated or stimulated  
583 with *C. albicans* for 2 h at an MOI of 1. RNA was isolated using the Innuprep RNA minikit 2.0  
584 (Jena Analytik, Germany) with an additional DNase digestion step (RNase-free DNase set;  
585 Qiagen, Germany). Quality and quantity of the total RNA samples were evaluated with the Tape  
586 Station 2200 (Agilent, USA) and the Nanodrop 1000 (Thermo Fisher Scientific, Germany),  
587 respectively. Stranded RNA libraries were then prepared from 1 µg total RNA using the TruSeq  
588 Stranded mRNA Prep Kit (Illumina, USA) following the manufacturer's protocol. Multiplexing of  
589 the samples was achieved using IDT–TruSeq RNA UD Indexes (Illumina, USA). The libraries  
590 were then loaded on a S1 Flowcell using the Xp Workflow and subjected to 100 cycles paired-end  
591 sequencing on the Illumina NovaSeq 6000 System.

592 **Analysis of sequencing data.** Our dataset is composed by 40 fastq files corresponding to reads  
593 one and two (paired-end sequencing) of the 20 samples of the project. Those 20 samples correspond  
594 to replicates one and two of the 10 different conditions. All these files can be found in the SRA  
595 repository (<https://www.ncbi.nlm.nih.gov/sra/PRJNA681392>). We used the galaxy-europe server  
596 (77) to map the fastq files and count the gene transcriptions; the following named functions are all  
597 included in the server and were used using the default parameters except where it is otherwise  
598 indicated. First, the quality of the fastq files was assessed using the function *FastQC* then the

599 adapter sequences were trimmed with the help of the function *Cutadapt* (78). This result was  
600 mapped to the human genome hg38 using the *RNA Star* (79) applied for pair-ended sequences, the  
601 “Length of the genomic sequence around annotated junctions” parameter was set to 50. From the  
602 *RNA Star* function, we obtained the bam files which were quality controlled and later used to look  
603 for gene counts with the *FeatureCount* function. We processed the reverse stranded bam files  
604 allowing for fragment counts but not multimapping. The minimum mapping quality per read was  
605 set to 10. Finally, we obtained the count files for each of the samples in the project.

606 **DEG fold-change analysis.** We analyzed the count files in R, using the *DESeq2* (80) and the *edgeR*  
607 (81) packages. The first step was to calculate the RPKM (Reads Per Kilobase Million) values for  
608 each gene, and discard those genes with an RPKM value lower than three. The remaining genes  
609 were processed to look for differentially expressed genes (DEG’s). For this purpose, a *DESeq*  
610 object was created with the design formula *C. albicans* + antibody meaning that the antibody  
611 treatments were being analyzed while controlling for the *C. albicans* stimulus. Then, we created  
612 the results tables based on the contrasts of antibody-treatments vs ISO treatment, for each of the  
613 CEACAM antibodies, respectively.

614 **PCA.** The principal component analysis (PCA) was made directly with the function embedded in  
615 the *DESeq2* package, using the top 500 genes. The antibody treatment was marked as interest  
616 group.

617 **Gene Ontology analysis.** The Gene Ontology (GO) knowledgebase (geneontology.org) (82, 83)  
618 was used for analysis of gene lists derived from the analysis of RNA-sequencing data (DEGs, as  
619 described above) using the *Panther* tool (84). Analysis summary: Analysis Type: PANTHER  
620 Overrepresentation Test (Released 20200728), Annotation Version and Release Date: GO  
621 Ontology database DOI: 10.5281/zenodo.4081749 Released 2020-10-09, Analyzed List: upload\_1  
622 (Homo sapiens), Reference List: Homo sapiens (all genes in database), Test Type: Fisher's Exact  
623 Binomial, Correction: Calculate False Discovery Rate.

624 **Heatmaps.** The heatmap grouping was defined based on significantly enriched GO terms  
625 important for neutrophil functions from the GO analysis (see “Gene Ontology analysis” above).  
626 The heatmaps present the normalized count values of the mentioned genes averaged over two  
627 biological replicates. Normal distribution was assumed. The normalization was done using the  
628 *counts* function of the *DESeq2* package with the parameter normalization set to true. Furthermore,  
629 within each subpanel heatmap the values were scaled (to mean = 0 and standard deviation = 1) by  
630 row, in order to facilitate the comparison between conditions (however, these are no longer absolute  
631 values).

632 **Subnetwork and Module analysis.** The network of human protein-protein interactions has been  
633 established in the FungiWeb database (C.H. Luther, C.W. Remmele, T. Dandekar, T. Müller, and  
634 M. Dittrich, submitted for publication, <http://fungiweb.bioapps.biozentrum.uni-wuerzburg.de>)  
635 (85). This network contains protein-protein interactions, which have been collected and curated  
636 from experimental data sets from the International Molecular Exchange (IMEx) consortium (86)  
637 via PSICQUIC queries (87) and have been filtered and curated to focus on experimental  
638 interactions only. Furthermore, interactions have been scored analogously to the MINT-Database  
639 score (87), which reflects the quality and quantity of experimental information supporting each  
640 interaction. For integrated network analysis only high and highest quality interactions (score cutoff  
641  $\geq 0.75$ ) have been used and a network comprising the largest connected component has been derived

642 with a total of 17.754 genes and 237.846 interactions. The integrated network analysis aims to  
643 identify the maximally responsive regions (modules) after stimulation within the large interactome  
644 network, according to the integrated gene expression profiles. Thus, for the network analysis,  
645 RNA-Seq data was first preprocessed by an in-house pipeline, and differential gene expression was  
646 analyzed using a generalized linear model as implemented in *DESeq2* (80), contrasting the different  
647 CEACAM-antibody treatments to the isotype antibody control. To obtain gene scores for the  
648 identification of responsive subnetworks a BUM (Beta Uniform Mixture) model has been fitted to  
649 the distribution of P-values using the routines in the *BioNet* package (88) choosing a stringent FDR  
650 (False Discovery Rate) threshold of  $10^{-19}$  to focus only on the maximally responsive region. Based  
651 on the scored network optimally responsive modules have been identified using an exact approach,  
652 which, albeit computationally demanding, is capable (mathematically proven) to identify provably  
653 optimal modules (89). Visualization of the resulting subnetworks has been performed using  
654 *Cytoscape* (90). Enrichment analysis of the network modules has been performed with *g:Profiler*  
655 (91) against the background set of the genes in the interaction network, using default settings and  
656 focusing on KEGG (92) pathways only. The information for cell membrane and secreted  
657 localization were obtained from UniProt (93). All statistical analyses have been performed with  
658 the computational statistics framework *R* (version 3.6.3).

659 **Systems biological modeling and network analysis.** We created protein signaling networks for  
660 CC6 (Fig. 5) and CC1 (Fig. S1C). These networks combined the gene regulatory data from the  
661 RNA-sequencing analysis with data base knowledge of protein-protein interactions. First, the  
662 relevant genes were selected as those which reached an adjusted p-value lower than 0.05 and  
663 resulted in an expression of at least two-fold (red and blue nodes in Fig. 5 and Fig. S1C). In addition  
664 to these genes, we assembled a set of known interacting proteins of the CEACAM receptors (gray  
665 nodes in Fig. 5 and Fig. S1C). We calculated the edges between nodes from three different sources.  
666 The first source is the *genie3* inference algorithm as presented in (94) and implemented in the  
667 *genie3* package in *R* (documentation at  
668 <https://bioconductor.org/packages/release/bioc/html/GENIE3.html>). This algorithm infers  
669 relations between nodes by creating a random forest classifier for each of the genes in the sample  
670 and the rest of the genes are used as variables. The algorithm then estimates the relevance of each  
671 gene for the classification of the target gene and based on this defines a weight that represent the  
672 plausibility of a connection between the two nodes. This value is not a statistical test and cannot be  
673 interpreted as such but it constitutes a ranking of the possible interactions between samples. For  
674 the CC6 network the threshold value was set to 0.45 and for CC1 the threshold value was set to  
675 0.1. The interactions obtained by this method are marked in the network figures (Fig. 5 and Fig.  
676 S1C) as dashed lines. Also, we estimate the sign of the interactions (activating or inhibitory) by  
677 calculation a partial correlation between samples. This was done using the *pcor* function of the  
678 *ppcor* package in *R* (95). Because of the low sample number, the partial correlations do not reach  
679 statistical significance, for that reason we take a conservative approach and set as inhibitory  
680 interactions, only those that are lower than -0.3. The other two methods used are data base search  
681 based. We searched the string (96) and the biogrid (97) databases. The string database search was  
682 made directly on the string database website using the multiprotein search function. The results  
683 were pruned to show only experimental, databases or co-expression relations between nodes. We  
684 exported the results as a tab delimited table and use it as directed connections for our network.



685 Finally, we consulted the biogrid data base by downloading the *BIOGRID-ALL-4.2.191*  
686 interactions file and searching in *R* for the interactions that involved proteins or genes in our  
687 network. Interaction files are available from our website ([https://www.biozentrum.uni-](https://www.biozentrum.uni-wuerzburg.de/bioinfo/computing/CEACAM/)  
688 [wuerzburg.de/bioinfo/computing/CEACAM/](https://www.biozentrum.uni-wuerzburg.de/bioinfo/computing/CEACAM/)).

689 For the final assembly of the network, any duplicate interactions were removed. With the remaining  
690 interactions we assembled the networks using the *yEd* graphics program (freeware,  
691 <https://www.yworks.com/products/yed> ). The gene ontology analysis of the DEG's within the  
692 network analysis was performed in *R* using the *TopGO* package (98). The annotation package  
693 *org.Hs.eg.db* from Bioconductor was used (99). The BP (Biological Process) ontology analysis  
694 was chosen. Two types of statistic measures were used for the enrichment analysis. Fischer's test,  
695 which is based on the gene count information, and a Kolmogorov-Smirnov-like test that relies on  
696 the gene scores, were made using the *classic* algorithm from the *TopGO* package. All the resulting  
697 *GO* terms and the respective test results for CC6 are provided in the Table S8. The results table is  
698 limited to the top 1000 results. The *GO* knowledgebase ([geneontology.org](http://geneontology.org)) (39, 40) was used for  
699 analysis of those genes for which we had no expression data (extra nodes added for the network  
700 analysis, explained later). We used the Panther tool (41). Analysis summary: Analysis Type:  
701 PANTHER Overrepresentation Test (Released 20200728), Annotation Version and Release Date:  
702 *GO* Ontology database DOI: 10.5281/zenodo.4081749 Released 2020-10-09, Analyzed List:  
703 upload\_1 (Homo sapiens), Reference List: Homo sapiens (all genes in database), Test Type:  
704 Fisher's Exact Binomial, Correction: Calculate False Discovery Rate.

705 **Dynamical modeling of the involved response network considering CEACAM6, CEACAM3**  
706 **and CEACAM1.** We performed simulations of the networks in Fig. 5 using Jimena (100). Jimena  
707 is a software that enables the dynamical simulation of protein networks by modeling the Boolean  
708 state of nodes as a continuous hill function (100). This method is recognized to result in validated  
709 Boolean and semiquantitative models for systems biology in infections for transcriptome data (101-  
710 103). The nodes can have continuous activation values that range from zero to one. The sign of the  
711 connections remains as activating or inhibitory. For our simulations we created an extra node to  
712 stimulate the network and analyze its response to that stimulus. The extra node created is called  
713 PATHOGEN (for the pathogen *C. albicans*) and has an activating connection to each of the  
714 CEACAM nodes in the study (CEACAM1, CEACAM3 and CEACAM6). Also, to link the  
715 CEACAM receptors to the rest of the network we set interactions from the CEACAM1,  
716 CEACAM3 and CEACAM6 nodes to the most two differentially expressed genes in our RNA-seq  
717 analysis (*IL6* and *ACOD1*). For CEACAM3, only a connection to *IL6* was established since  
718 *ACOD1* was not differentially expressed in that case.

719 **Venn diagrams.** Venn diagrams were calculated using the following online platform:  
720 <http://bioinformatics.psb.ugent.be/webtools/Venn/>. Lists of genes allocated to partitions of the  
721 respective diagrams were exported.

722 **Data availability.** Sequencing data are available under the following link:  
723 <http://www.ncbi.nlm.nih.gov/bioproject/681392>.

724 **Statistics.** Statistical analysis of all cell-based assays was performed using One-Way ANNOVA  
725 or Repeated Measures ANNOVA with Bonferroni post-test as indicated.

726

727 **Funding.** This work was supported by the German Research Foundation (Collaborative Research  
728 Center/Transregio 124 – FungiNet —Pathogenic fungi and their human host: Networks of  
729 Interaction, DFG project number 210879364, Projects B1, B2, and A5) to TD, MD, and HS, and  
730 ProChance 2018 – Programmlinie A1 (Förderkennzeichen 2.11.3-A1/218-01) to EK. The funders  
731 had no role in study design, data collection and interpretation, or the decision to submit the work  
732 for publication.

733  
734 **Acknowledgement.** We thank Simone Tänzer, Moira Stark, Birgit Maranca-Hüwel, and Bärbel  
735 Gobs-Hevelke for their excellent technical support.

736

737

## 738 **Figure Legends**

739

740 **Figure 1: Altered *C. albicans*-induced CXCL8 release by neutrophil treatment with anti-  
741 CEACAM6 antibody.** Human neutrophils were left untreated or were incubated with 10 µg/ml  
742 mouse IgG1 isotype control antibody (clone MOPC-21), or monoclonal CEACAM-specific mouse  
743 monoclonal IgG1 antibodies for 45 min and were consecutively incubated with or without live  
744 *C. albicans* yeast cells (MOI 1) for 2 h. Antibody clones and their specific (cross-) reactivities for  
745 CEACAM1, CEACAM3 and CEACAM6 are indicated in (B) and (D). Cell culture supernatants  
746 were harvested and analyzed for CXCL8 concentrations in 2-7 independent experiments for the  
747 different treatment groups, represented by the single dots in the graphs. (A) CXCL8 release in  
748 untreated and isotype-treated neutrophils without and with *C. albicans* stimulation. (B) CXCL8  
749 release in *C. albicans*-stimulated cells including all anti-CEACAM antibody treatments. (C)  
750 Samples pre-treated with isotype, B3-17 and 1H7-4B from (B) were plotted with linked samples  
751 from the same donor. Note the donor-independent relative increase of the CXCL8 response to  
752 *C. albicans* treatment after pre-stimulation with the CEACAM1- and the CEACAM6-  
753 monospecific antibody, respectively. (D) CXCL8 release after antibody treatments in absence of  
754 *C. albicans*. Statistical analyses were performed by One-Way ANOVA with Bonferroni post-test.  
755

756 **Figure 2: No alterations of *C. albicans* binding, ROS production and *C. albicans* killing by  
757 human neutrophils in response to anti-CEACAM antibodies.** (A, B) Human neutrophils were  
758 stained for CD11b and left untreated or were incubated with 10 µg/ml isotype control antibody  
759 (clone MOPC-21), or monoclonal antibodies B3-17 (CC1), 308/3-3 (CC3), or 1H7-4B (CC6) for  
760 45 min and were consecutively incubated with (A, B) or without (B) live, APC-labeled *C. albicans*  
761 yeast cells (MOI 1) for 20 min. Cells were then analyzed by flow cytometry for the percentage of  
762 *C. albicans*-bound neutrophils and the ROS production by DHR123. The graphs show the  
763 percentage of *C. albicans*-bound granulocytes (A), the logarithmized fluorescent signal of the  
764 DHR123 dye (B), and the respective means from two independent experiments. (C)  $2 \times 10^5$  human  
765 neutrophils ( $2 \times 10^6$ /ml) were left untreated or were incubated with 10 µg/ml isotype control  
766 antibody (clone MOPC-21), or monoclonal antibodies B3-17 (CC1), 308/3-3 (CC3), or 1H7-4B  
767 (CC6) for 45 min and were consecutively incubated with live *C. albicans* yeast cells (MOI 1) for  
768 30 min. Viable *C. albicans* cells were quantified by XTT assay. The graph shows mean and SD

769 from three independent experiments (Statistics: Repeated Measures ANOVA; no significant  
770 differences).

771  
772 **Figure 3: Altered Ca-induced neutrophil transcriptional response by priming with anti-**  
773 **CEACAM antibodies.** Human neutrophils were left untreated or were incubated with 10 µg/ml  
774 isotype control antibody (clone MOPC-21), or monoclonal antibodies B3-17 (CC1), 308/3-3  
775 (CC3), or 1H7-4B (CC6) for 45 min and were consecutively incubated with or without live  
776 *C. albicans* yeast cells (MOI 1) for 2 h; mRNA was extracted and analyzed by sequencing. (A)  
777 PCA analysis of all antibody-treated samples in presence of *C. albicans* and IgG-treated control  
778 cells without *C. albicans* stimulation. Please refer to Figure S1A for a PCA including all samples.  
779 (B, C, D, E) Data presented in Figure 3A and Tables S1 and S3 were further analyzed for the  
780 CEACAM-specific responses by comparing shared differentially expressed genes (DEGs) from the  
781 different treatment groups. Only significantly regulated genes (adjusted p-value <0.05, fold-change  
782 at least ±2) were included. Note that for Venn diagrams, both, protein-coding and non-protein-  
783 coding genes were included. (B) Venn diagram of DEGs induced by anti-CEACAM antibody  
784 treatment and *C. albicans*-stimulation (IgG-treated neutrophils with *C. albicans* stimulation versus  
785 CC1-, CC3-, or CC6-treated neutrophils with *C. albicans* stimulation, respectively). Please refer to  
786 Table S3 for the DEGs within the partitions of the Venn diagram. (C) Venn diagram of DEGs  
787 regulated in a *C. albicans*-specific manner by CEACAM1 treatment alone (CC1) or in presence of  
788 *C. albicans* (CC1+Ca). Please refer to Table S4 for the classification of the DEGs into the partitions  
789 of the Venn diagram. (D) Venn diagram of DEGs regulated in a *C. albicans*-specific manner by  
790 CEACAM treatment alone (CC6) or in presence of *C. albicans* (CC6+Ca). Please refer to Table  
791 S5 for the classification of the DEGs into the partitions of the Venn diagram. (E) Venn diagram of  
792 differentially expressed genes (DEGs) induced by antibody stimulations alone (IgG-treated  
793 neutrophils versus CC1-, CC3-, or CC6-treated neutrophils, respectively). Please refer to Table S6  
794 for the classification of the DEGs into the partitions of the Venn diagram.

795  
796 **Figure 4: CEACAM6-specific transcriptional responses of neutrophils in the presence of**  
797 ***C. albicans* and comparison to CEACAM1 and CEACAM3 antibody ligation experiments.**  
798 Heat maps display DEGs after CEACAM6 (CC6) treatment in presence of *C. albicans* stimulation  
799 from major enriched GO categories (adjusted p-value < 0.05 and fold-change >±2; see also Table  
800 S1 for a complete list with fold-changes of all genes differentially expressed after CC6 treatment).  
801 The relative expression of each gene is shown for all treatment groups with *C. albicans* stimulation  
802 (untreated, UT; isotype control antibody-treated, IGG; B3-17-treated, CC1; 308/3-3-treated, CC3;  
803 1H7-4B-treated, CC6). Each row was normalized (mean = 0) and scaled (standard deviation = 1);  
804 \*also padj < 0.05 for CC1, \*\* also padj < 0.05 for CC3.

805  
806 **Figure 5. Integrated network analysis of CEACAM6-regulated genes in presence of**  
807 ***C. albicans*.** Based on gene expression profiles, the optimally CEACAM6-responsive network  
808 module in presence of *C. albicans* has been identified. Subsequent KEGG enrichment analysis  
809 detected key signaling pathways of CEACAM6-antibody treated neutrophils stimulated with  
810 *C. albicans*, including apoptosis as well as NF-kappa-B and TLR signaling (pathway associated  
811 genes are highlighted and framed).

812  
813 **Figure 6: Cell function-centered network analysis of CEACAM6-regulated genes in presence**  
814 **of *C. albicans*.** Signaling network assembled from the DEGs in CEACAM6-treated neutrophils in  
815 presence of *C. albicans* stimulation (blue and red nodes, Table S1) and known interactors of  
816 CEACAM family receptors (gray nodes). Interactions are inferred from the RNA-seq samples  
817 (dashed lines) or obtained from interaction databases (solid lines). Nodes belonging to significantly  
818 enriched GO terms important to neutrophil responses are clustered and framed.

819  
820 **Figure 7: Verification of the predicted altered apoptosis of human neutrophils after**  
821 **stimulation with *C. albicans* by CEACAM6 ligation.** Human neutrophils were left untreated or  
822 were incubated with the following antibodies: isotype control (Iso), B3-17 (CC1), 308/3-3 (CC3)  
823 or 1H7-4B (CC6) for 45 min. Afterwards, cells were incubated with or without live *C. albicans*  
824 yeast cells (MOI 1) for 4 h (A, B, C) or for 24 h (D). Viability of human neutrophils after 4 h of  
825 *C. albicans*-stimulation was determined by Annexin V and propidium iodide staining with  
826 subsequent flow cytometric analysis. (A, C, D) graphs display the percentage of viable neutrophils  
827 (% of total neutrophils). (B) The graph displays the samples shown in (A) as percentage of viable  
828 neutrophils compared to untreated cells in each experiment (viable untreated cells = 100%) to  
829 highlight the donor-independent relative effect of CEACAM6 treatment on *C. albicans*-induced  
830 apoptosis. Statistical analysis was performed by Repeated Measures ANOVA and Bonferroni post-  
831 test.

832  
833 **Figure 8: *IL1B* transcription and IL-1 $\beta$  secretion *in vitro*.** Human neutrophils were left untreated  
834 or were incubated with the following antibodies: isotype control (Iso), B3-17 (CC1), 308/3-3 (CC3)  
835 or 1H7-4B (CC6) for 45 min. Afterwards, cells were incubated with or without live *C. albicans*  
836 yeast cells (MOI 1) for 2 h (A) or 21 h (B, C). (A) mRNA was extracted after 2 h and analyzed by  
837 sequencing. Fold-changes of the *IL1B* gene expression compared to isotype treatment in absence  
838 or presence of *C. albicans* stimulation, respectively, are shown. Fold-changes with an adjusted p-  
839 value<0.05 are marked with an asterisk. (B, C) Supernatants were collected after 21 h and analyzed  
840 for IL-1 $\beta$  concentrations (sensitivity: 4 pg/ml). Statistical analysis was performed by Repeated  
841 Measures ANOVA and Bonferroni post-test; samples below the detection range were set to the  
842 detection limit for statistical analysis.

843  
844 **Figure 9: Predicted and experimentally measured IL-6 secretion in anti-CEACAM3-treated**  
845 **samples.** (A) Sub-network of *IL1B* induction by IL6 signaling. The network shown is a subgraph  
846 from the network displayed in Figure 5. All paths between IL6 and *IL1B* up to 7 nodes long were  
847 extracted; dashed lines: inferred interactions from our network analysis, solid lines: interactions  
848 obtained from data bases. (B-D) Human neutrophils were left untreated or were incubated with the  
849 following antibodies: isotype control (Iso), B3-17 (CC1), 308/3-3 (CC3) or 1H7-4B (CC6) for 45  
850 min. Afterwards, cells were incubated with or without live *C. albicans* yeast cells (MOI 1) for 2 h  
851 (B) or 21 h (C, D). (B) mRNA was extracted after 2 h and analyzed by sequencing. Fold-changes  
852 of the *IL6* gene expression compared to isotype treatment in absence or presence of *C. albicans*  
853 stimulation, respectively, are shown. Fold-changes with an adjusted p-value<0.05 are marked with  
854 an asterisk. (C, D) Supernatants were collected after 21 h and analyzed for IL-6 concentrations

855 (sensitivity: 2 pg/ml). Statistical analysis was performed by Repeated Measure ANOVA and  
856 Bonferroni post-test.

857

## 858 Supplemental Figure Legends

859

860 **Figure S1: Additional analyses of transcriptomic data.** (A) Principal component analysis (PCA)  
861 of all samples (untreated, UT; isotype control antibody-treated, Iso; B3-17-treated, CC1, 308/3-3-  
862 treated, CC3; 1H7-4B-treated, CC6) without (US) and with *C. albicans* stimulation (+Ca)  
863 presented in Figure 3. (B) Altered *C. albicans*-induced neutrophil transcriptional response after  
864 treatment with anti-CEACAM1 antibody. Heat maps display DEGs after CEACAM1 (CC1)  
865 treatment in presence of *C. albicans* from major enriched GO categories (adjusted p-value < 0.05  
866 and fold-change  $\geq \pm 2$ ; see also Table S1 for a complete list with fold-changes of all DEGs). The  
867 relative expression of each gene is shown for all treatment groups with *C. albicans* stimulation  
868 (untreated, UT; isotype control antibody-treated, IGG; B3-17-treated, CC1; 308/3-3-treated, CC3;  
869 1H7-4B-treated, CC6). Each row was normalized (mean = 0) and scaled (standard deviation = 1);  
870 \*also padj < 0.05 for CC6, \*\* also padj < 0.05 for CC3. Note that “programmed cell death” and  
871 “secretion” were not among the enriched GO categories. (C) Signaling network assembled from  
872 the DEGs in CC1-treated neutrophils in presence of *C. albicans* stimulation (blue and red nodes,  
873 Table S1) and known interactors of CEACAM family receptors (gray nodes). Interactions are  
874 inferred from the RNA-seq samples (dashed lines) or obtained from interaction databases (solid  
875 lines). Nodes belonging to significantly enriched GO terms important to neutrophil responses are  
876 clustered and framed.

877

878 **Figure S2. Result curves of the dynamical simulation of Figs. 5 and S1C.** The whole networks  
879 around the CEACAM receptors and each protein activation pathway was modelled and considered  
880 in the dynamical simulation of the pathogen stimulation effects. For the simulations the extra node  
881 “PATHOGEN” (for pathogen *C. albicans*) was added to the network; this node is activating and  
882 linked to the CEACAM1 (A) and the CEACAM6 (B) node, respectively. The information flow  
883 was modeled using Hill functions. Selected trajectories are presented here.

884

## 885 Supplemental Tables

886

887 **Table S1: Significantly differentially expressed genes in anti-CEACAM antibody treated**  
888 **neutrophils versus isotype-treated neutrophils in presence of *C. albicans* infection.**

889 Differentially expressed genes (DEGs; fold-change  $\geq \pm 2$ , adjusted p-value < 0.05) from  
890 transcriptomic analysis shown in Fig. 3A are listed for the given comparisons. Empty cells signify  
891 that no significant differences for a fold-change of at least  $\pm 2$ -fold were found for the respective  
892 gene in the comparison. Numbers in brackets indicate the combined effect of *C. albicans*-induced  
893 changes (column 2) and their alteration by CEACAM1 or CEACAM6 antibody treatment (columns  
894 3 and 5, respectively); synergistic positive co-regulation is indicated by blue numbers, negative co-  
895 regulation by red numbers and counter-regulation by gray numbers.

896

897 **Table S2: Significantly differentially expressed genes with at least +/- 2-fold-change in**  
898 **CEACAM1-, CEACAM3-, and CEACAM6-treated neutrophils versus isotype-treated**  
899 **neutrophils without *C. albicans* stimulation.**

900 Differentially expressed genes (DEGs; fold-change  $>\pm 2$ , adjusted p-value  $<0.05$ ) from  
901 transcriptomic analysis shown in Figs. 3E and S1A are listed for the given comparisons. Empty  
902 cells signify that no significant differences for a fold-change of at least  $\pm 2$ -fold were found for the  
903 respective gene in the comparison.

904

905 **Table S3: Genes included in the partitions of the Venn diagram in Figure 2B.**

906

907 **Table S4: Genes includes in the partitions of the Venn diagram in Figure 2C.**

908

909 **Table S5: Genes includes in the partitions of the Venn diagram in Figure 2D.**

910

911 **Table S6: Genes includes in the partitions of the Venn diagram in Figure 2E**

912

913 **Table S7: Enriched pathways of the network analysis presented in Figure 5.**

914

915 **Table S8: Enriched cellular functions (Gene Ontology) of the network analysis presented in**  
916 **Figure 6.**

917

## 918 **References**

- 919 1. Kullberg BJ, Arendrup MC. 2015. Invasive Candidiasis. *N Engl J Med* 373:1445-56.
- 920 2. Sonogo F, Castanheira FV, Ferreira RG, Kanashiro A, Leite CA, Nascimento DC, Colon DF, Borges  
921 Vde F, Alves-Filho JC, Cunha FQ. 2016. Paradoxical Roles of the Neutrophil in Sepsis: Protective  
922 and Deleterious. *Front Immunol* 7:155.
- 923 3. Tamassia N, Bianchetto-Aguilera F, Arruda-Silva F, Gardiman E, Gasperini S, Calzetti F, Cassatella  
924 MA. 2018. Cytokine production by human neutrophils: Revisiting the "dark side of the moon".  
925 *Eur J Clin Invest* 48 Suppl 2:e12952.
- 926 4. Metzemaekers M, Gouwy M, Proost P. 2020. Neutrophil chemoattractant receptors in health  
927 and disease: double-edged swords. *Cell Mol Immunol* 17:433-450.
- 928 5. Schauer AE, Klassert TE, von Lachner C, Riebold D, Schneeweiss A, Stock M, Muller MM,  
929 Hammerschmidt S, Bufler P, Seifert U, Dietert K, Dinarello CA, Nold MF, Gruber AD, Nold-Petry  
930 CA, Slevogt H. 2017. IL-37 Causes Excessive Inflammation and Tissue Damage in Murine  
931 Pneumococcal Pneumonia. *J Innate Immun* 9:403-418.
- 932 6. Azcutia V, Parkos CA, Brazil JC. 2017. Role of negative regulation of immune signaling pathways  
933 in neutrophil function. *J Leukoc Biol* doi:10.1002/JLB.3MIR0917-374R.
- 934 7. Sadarangani M, Pollard AJ, Gray-Owen SD. 2011. Opa proteins and CEACAMs: pathways of  
935 immune engagement for pathogenic *Neisseria*. *FEMS Microbiol Rev* 35:498-514.
- 936 8. Singer BB, Opp L, Heinrich A, Schreiber F, Binding-Liermann R, Berrocal-Almanza LC, Heyl KA,  
937 Muller MM, Weimann A, Zweigner J, Slevogt H. 2014. Soluble CEACAM8 interacts with CEACAM1  
938 inhibiting TLR2-triggered immune responses. *PLoS One* 9:e94106.
- 939 9. Slevogt H, Seybold J, Tiwari KN, Hocke AC, Jonatat C, Dietel S, Hippenstiel S, Singer BB, Bachmann  
940 S, Suttorp N, Opitz B. 2007. *Moraxella catarrhalis* is internalized in respiratory epithelial cells by a  
941 trigger-like mechanism and initiates a TLR2- and partly NOD1-dependent inflammatory immune  
942 response. *Cell Microbiol* 9:694-707.
- 943 10. Lu R, Pan H, Shively JE. 2012. CEACAM1 negatively regulates IL-1beta production in LPS activated  
944 neutrophils by recruiting SHP-1 to a SYK-TLR4-CEACAM1 complex. *PLoS Pathog* 8:e1002597.
- 945 11. Gray-Owen SD, Blumberg RS. 2006. CEACAM1: contact-dependent control of immunity. *Nat Rev*  
946 *Immunol* 6:433-46.
- 947 12. Klaile E, Muller MM, Schafer MR, Clauder AK, Feer S, Heyl KA, Stock M, Klassert TE, Zipfel PF,  
948 Singer BB, Slevogt H. 2017. Binding of *Candida albicans* to Human CEACAM1 and CEACAM6  
949 Modulates the Inflammatory Response of Intestinal Epithelial Cells. *mBio* 8.
- 950 13. Singer BB, Scheffrahn I, Heymann R, Sigmundsson K, Kammerer R, Obrink B. 2002.  
951 Carcinoembryonic antigen-related cell adhesion molecule 1 expression and signaling in human,  
952 mouse, and rat leukocytes: evidence for replacement of the short cytoplasmic domain isoform  
953 by glycosylphosphatidylinositol-linked proteins in human leukocytes. *J Immunol* 168:5139-46.
- 954 14. Tchoupa AK, Schuhmacher T, Hauck CR. 2014. Signaling by epithelial members of the CEACAM  
955 family - mucosal docking sites for pathogenic bacteria. *Cell Commun Signal* 12:27.
- 956 15. Helfrich I, Singer BB. 2019. Size Matters: The Functional Role of the CEACAM1 Isoform Signature  
957 and Its Impact for NK Cell-Mediated Killing in Melanoma. *Cancers (Basel)* 11.
- 958 16. Muller MM, Singer BB, Klaile E, Obrink B, Lucka L. 2005. Transmembrane CEACAM1 affects  
959 integrin-dependent signaling and regulates extracellular matrix protein-specific morphology and  
960 migration of endothelial cells. *Blood* 105:3925-34.

- 961 17. Javaheri A, Kruse T, Moonens K, Mejias-Luque R, Debraekeleer A, Asche CI, Tegtmeier N, Kalali B,  
962 Bach NC, Sieber SA, Hill DJ, Koniger V, Hauck CR, Moskalenko R, Haas R, Busch DH, Klaile E,  
963 Slevogt H, Schmidt A, Backert S, Remaut H, Singer BB, Gerhard M. 2016. Helicobacter pylori  
964 adhesin HopQ engages in a virulence-enhancing interaction with human CEACAMs. *Nat*  
965 *Microbiol* 2:16189.
- 966 18. Slevogt H, Zabel S, Opitz B, Hocke A, Eitel J, N'Guessan P D, Lucka L, Riesbeck K, Zimmermann W,  
967 Zweigner J, Temmesfeld-Wollbrueck B, Suttorp N, Singer BB. 2008. CEACAM1 inhibits Toll-like  
968 receptor 2-triggered antibacterial responses of human pulmonary epithelial cells. *Nat Immunol*  
969 9:1270-8.
- 970 19. Kammerer R, Hahn S, Singer BB, Luo JS, von Kleist S. 1998. Biliary glycoprotein (CD66a), a cell  
971 adhesion molecule of the immunoglobulin superfamily, on human lymphocytes: structure,  
972 expression and involvement in T cell activation. *Eur J Immunol* 28:3664-74.
- 973 20. Singer BB, Klaile E, Scheffrahn I, Muller MM, Kammerer R, Reutter W, Obrink B, Lucka L. 2005.  
974 CEACAM1 (CD66a) mediates delay of spontaneous and Fas ligand-induced apoptosis in  
975 granulocytes. *Eur J Immunol* 35:1949-59.
- 976 21. Khairnar V, Duhan V, Maney SK, Honke N, Shaabani N, Pandya AA, Seifert M, Pozdeev V, Xu HC,  
977 Sharma P, Baldin F, Marquardsen F, Merches K, Lang E, Kirschning C, Westendorf AM, Haussinger  
978 D, Lang F, Dittmer U, Kuppers R, Recher M, Hardt C, Scheffrahn I, Beauchemin N, Gothert JR,  
979 Singer BB, Lang PA, Lang KS. 2015. CEACAM1 induces B-cell survival and is essential for  
980 protective antiviral antibody production. *Nat Commun* 6:6217.
- 981 22. Khairnar V, Duhan V, Patil AM, Zhou F, Bhat H, Thoens C, Sharma P, Adomati T, Friendrich SK,  
982 Bezgovsek J, Dreesen JD, Wennemuth G, Westendorf AM, Zelinskyy G, Dittmer U, Hardt C, Timm  
983 J, Gothert JR, Lang PA, Singer BB, Lang KS. 2018. CEACAM1 promotes CD8(+) T cell responses and  
984 improves control of a chronic viral infection. *Nat Commun* 9:2561.
- 985 23. Bonsignore P, Kuiper JWP, Adrian J, Goob G, Hauck CR. 2019. CEACAM3-A Prim(at)e Invention for  
986 Opsonin-Independent Phagocytosis of Bacteria. *Front Immunol* 10:3160.
- 987 24. Sintsova A, Guo CX, Sarantis H, Mak TW, Glogauer M, Gray-Owen SD. 2018. Bcl10 synergistically  
988 links CEACAM3 and TLR-dependent inflammatory signalling. *Cell Microbiol* 20.
- 989 25. Heinrich A, Heyl KA, Klaile E, Muller MM, Klassert TE, Wiessner A, Fischer K, Schumann RR,  
990 Seifert U, Riesbeck K, Moter A, Singer BB, Bachmann S, Slevogt H. 2016. *Moraxella catarrhalis*  
991 induces CEACAM3-Syk-CARD9-dependent activation of human granulocytes. *Cell Microbiol*  
992 18:1570-1582.
- 993 26. Gutbier B, Fischer K, Doehn JM, von Lachner C, Herr C, Klaile E, Frischmann U, Singer BB,  
994 Riesbeck K, Zimmermann W, Suttorp N, Bachmann S, Bals R, Witzenrath M, Slevogt H. 2015.  
995 *Moraxella catarrhalis* induces an immune response in the murine lung that is independent of  
996 human CEACAM5 expression and long-term smoke exposure. *Am J Physiol Lung Cell Mol Physiol*  
997 309:L250-61.
- 998 27. Pils S, Kopp K, Peterson L, Delgado Tascon J, Nyffenegger-Jann NJ, Hauck CR. 2012. The adaptor  
999 molecule Nck localizes the WAVE complex to promote actin polymerization during CEACAM3-  
1000 mediated phagocytosis of bacteria. *PLoS One* 7:e32808.
- 1001 28. Sarantis H, Gray-Owen SD. 2012. Defining the roles of human carcinoembryonic antigen-related  
1002 cellular adhesion molecules during neutrophil responses to *Neisseria gonorrhoeae*. *Infect Immun*  
1003 80:345-58.



- 1004 29. Tegtmeyer N, Ghete TD, Schmitt V, Remmerbach T, Cortes MCC, Bondoc EM, Graf HL, Singer BB,  
1005 Hirsch C, Backert S. 2020. Type IV secretion of *Helicobacter pylori* CagA into oral epithelial cells is  
1006 prevented by the absence of CEACAM receptor expression. *Gut Pathog* 12:25.
- 1007 30. Tegtmeyer N, Harrer A, Schmitt V, Singer BB, Backert S. 2019. Expression of CEACAM1 or  
1008 CEACAM5 in AZ-521 cells restores the type IV secretion deficiency for translocation of CagA by  
1009 *Helicobacter pylori*. *Cell Microbiol* 21:e12965.
- 1010 31. Behrens IK, Busch B, Ishikawa-Ankerhold H, Palamides P, Shively JE, Stanners C, Chan C, Leung N,  
1011 Gray-Owen S, Haas R. 2020. The HopQ-CEACAM Interaction Controls CagA Translocation,  
1012 Phosphorylation, and Phagocytosis of *Helicobacter pylori* in Neutrophils. *mBio* 11.
- 1013 32. Brewer ML, Dymock D, Brady RL, Singer BB, Virji M, Hill DJ. 2019. *Fusobacterium* spp. target  
1014 human CEACAM1 via the trimeric autotransporter adhesin CbpF. *J Oral Microbiol* 11:1565043.
- 1015 33. Pan H, Shively JE. 2010. Carcinoembryonic antigen-related cell adhesion molecule-1 regulates  
1016 granulopoiesis by inhibition of granulocyte colony-stimulating factor receptor. *Immunity* 33:620-  
1017 31.
- 1018 34. Zhang Z, La Placa D, Nguyen T, Kujawski M, Le K, Li L, Shively JE. 2019. CEACAM1 regulates the IL-  
1019 6 mediated fever response to LPS through the RP105 receptor in murine monocytes. *BMC*  
1020 *Immunol* 20:7.
- 1021 35. Xie Q, Brackenbury LS, Hill DJ, Williams NA, Qu X, Virji M. 2014. *Moraxella catarrhalis* adhesin  
1022 UspA1-derived recombinant fragment rD-7 induces monocyte differentiation to CD14+CD206+  
1023 phenotype. *PLoS One* 9:e90999.
- 1024 36. Skubitz KM, Campbell KD, Skubitz AP. 1996. CD66a, CD66b, CD66c, and CD66d each  
1025 independently stimulate neutrophils. *J Leukoc Biol* 60:106-17.
- 1026 37. Skubitz KM, Skubitz AP. 2008. Interdependency of CEACAM-1, -3, -6, and -8 induced human  
1027 neutrophil adhesion to endothelial cells. *J Transl Med* 6:78.
- 1028 38. Saalbach A, Arnhold J, Lessig J, Simon JC, Anderegg U. 2008. Human Thy-1 induces secretion of  
1029 matrix metalloproteinase-9 and CXCL8 from human neutrophils. *Eur J Immunol* 38:1391-403.
- 1030 39. Pellme S, Morgelin M, Tapper H, Mellqvist UH, Dahlgren C, Karlsson A. 2006. Localization of  
1031 human neutrophil interleukin-8 (CXCL-8) to organelle(s) distinct from the classical granules and  
1032 secretory vesicles. *J Leukoc Biol* 79:564-73.
- 1033 40. Hatanaka E, Monteagudo PT, Marrocos MS, Campa A. 2006. Neutrophils and monocytes as  
1034 potentially important sources of proinflammatory cytokines in diabetes. *Clin Exp Immunol*  
1035 146:443-7.
- 1036 41. Hidalgo MA, Carretta MD, Teuber SE, Zarate C, Carcamo L, Concha, II, Burgos RA. 2015. fMLP-  
1037 Induced IL-8 Release Is Dependent on NADPH Oxidase in Human Neutrophils. *J Immunol Res*  
1038 2015:120348.
- 1039 42. Klaile E, Muller MM, Zubiria-Barrera C, Brehme S, Klassert TE, Stock M, Durotin A, Nguyen TD,  
1040 Feer S, Singer BB, Zipfel PF, Rudolphi S, Jacobsen ID, Slevogt H. 2019. Unaltered Fungal Burden  
1041 and Lethality in Human CEACAM1-Transgenic Mice During *Candida albicans* Dissemination and  
1042 Systemic Infection. *Front Microbiol* 10:2703.
- 1043 43. Schirbel A, Rebert N, Sadler T, West G, Rieder F, Wagener C, Horst A, Sturm A, de la Motte C,  
1044 Fiocchi C. 2019. Mutual Regulation of TLR/NLR and CEACAM1 in the Intestinal Microvasculature:  
1045 Implications for IBD Pathogenesis and Therapy. *Inflamm Bowel Dis* 25:294-305.
- 1046 44. Bourgeois C, Kuchler K. 2012. Fungal pathogens-a sweet and sour treat for toll-like receptors.  
1047 *Front Cell Infect Microbiol* 2:142.

- 1048 45. Philip NH, Dillon CP, Snyder AG, Fitzgerald P, Wynosky-Dolfi MA, Zwack EE, Hu B, Fitzgerald L,  
1049 Mauldin EA, Copenhaver AM, Shin S, Wei L, Parker M, Zhang J, Oberst A, Green DR, Brodsky IE.  
1050 2014. Caspase-8 mediates caspase-1 processing and innate immune defense in response to  
1051 bacterial blockade of NF-kappaB and MAPK signaling. *Proc Natl Acad Sci U S A* 111:7385-90.
- 1052 46. Fritsch M, Gunther SD, Schwarzer R, Albert MC, Schorn F, Werthenbach JP, Schiffmann LM, Stair  
1053 N, Stocks H, Seeger JM, Lamkanfi M, Kronke M, Pasparakis M, Kashkar H. 2019. Caspase-8 is the  
1054 molecular switch for apoptosis, necroptosis and pyroptosis. *Nature* 575:683-687.
- 1055 47. Sarantis H, Gray-Owen SD. 2007. The specific innate immune receptor CEACAM3 triggers  
1056 neutrophil bactericidal activities via a Syk kinase-dependent pathway. *Cell Microbiol* 9:2167-80.
- 1057 48. Sintsova A, Sarantis H, Islam EA, Sun CX, Amin M, Chan CH, Stanners CP, Glogauer M, Gray-Owen  
1058 SD. 2014. Global analysis of neutrophil responses to *Neisseria gonorrhoeae* reveals a self-  
1059 propagating inflammatory program. *PLoS Pathog* 10:e1004341.
- 1060 49. Schmitter T, Agerer F, Peterson L, Munzner P, Hauck CR. 2004. Granulocyte CEACAM3 is a  
1061 phagocytic receptor of the innate immune system that mediates recognition and elimination of  
1062 human-specific pathogens. *J Exp Med* 199:35-46.
- 1063 50. Schmitter T, Pils S, Sakk V, Frank R, Fischer KD, Hauck CR. 2007. The granulocyte receptor  
1064 carcinoembryonic antigen-related cell adhesion molecule 3 (CEACAM3) directly associates with  
1065 Vav to promote phagocytosis of human pathogens. *J Immunol* 178:3797-805.
- 1066 51. Schmitter T, Pils S, Weibel S, Agerer F, Peterson L, Buntru A, Kopp K, Hauck CR. 2007. Opa  
1067 proteins of pathogenic neisseriae initiate Src kinase-dependent or lipid raft-mediated uptake via  
1068 distinct human carcinoembryonic antigen-related cell adhesion molecule isoforms. *Infect Immun*  
1069 75:4116-26.
- 1070 52. Hauck CR, Lorenzen D, Saas J, Meyer TF. 1997. An in vitro-differentiated human cell line as a  
1071 model system to study the interaction of *Neisseria gonorrhoeae* with phagocytic cells. *Infect*  
1072 *Immun* 65:1863-9.
- 1073 53. Slaats J, Ten Oever J, van de Veerdonk FL, Netea MG. 2016. IL-1beta/IL-6/CRP and IL-18/ferritin:  
1074 Distinct Inflammatory Programs in Infections. *PLoS Pathog* 12:e1005973.
- 1075 54. Nijhuis J, Rensen SS, Slaats Y, van Dielen FM, Buurman WA, Greve JW. 2009. Neutrophil  
1076 activation in morbid obesity, chronic activation of acute inflammation. *Obesity (Silver Spring)*  
1077 17:2014-8.
- 1078 55. Muller MM, Klaile E, Vorontsova O, Singer BB, Obrink B. 2009. Homophilic adhesion and  
1079 CEACAM1-S regulate dimerization of CEACAM1-L and recruitment of SHP-2 and c-Src. *J Cell Biol*  
1080 187:569-81.
- 1081 56. Singer BB, Scheffrahn I, Obrink B. 2000. The tumor growth-inhibiting cell adhesion molecule  
1082 CEACAM1 (C-CAM) is differently expressed in proliferating and quiescent epithelial cells and  
1083 regulates cell proliferation. *Cancer Res* 60:1236-44.
- 1084 57. Dittrich M, Mueller HM, Bauer H, Peirats-Llobet M, Rodriguez PL, Geilfus CM, Carpentier SC, Al  
1085 Rasheid KAS, Kollist H, Merilo E, Herrmann J, Muller T, Ache P, Hetherington AM, Hedrich R.  
1086 2019. The role of Arabidopsis ABA receptors from the PYR/PYL/RCAR family in stomatal  
1087 acclimation and closure signal integration. *Nat Plants* 5:1002-1011.
- 1088 58. Han ZM, Huang HM, Sun YW. 2018. Effect of CEACAM-1 knockdown in human colorectal cancer  
1089 cells. *Oncol Lett* 16:1622-1626.

- 1090 59. N'Guessan PD, Vigelahn M, Bachmann S, Zabel S, Opitz B, Schmeck B, Hippenstiel S, Zweigner J,  
1091 Riesbeck K, Singer BB, Suttorp N, Slevogt H. 2007. The UspA1 protein of *Moraxella catarrhalis*  
1092 induces CEACAM-1-dependent apoptosis in alveolar epithelial cells. *J Infect Dis* 195:1651-60.
- 1093 60. Cameron S, de Long LM, Hazar-Rethinam M, Topkas E, Endo-Munoz L, Cumming A, Gannon O,  
1094 Guminski A, Saunders N. 2012. Focal overexpression of CEACAM6 contributes to enhanced  
1095 tumorigenesis in head and neck cancer via suppression of apoptosis. *Mol Cancer* 11:74.
- 1096 61. Chan CH, Camacho-Leal P, Stanners CP. 2007. Colorectal hyperplasia and dysplasia due to human  
1097 carcinoembryonic antigen (CEA) family member expression in transgenic mice. *PLoS One*  
1098 2:e1353.
- 1099 62. Duxbury MS, Matros E, Ito H, Zinner MJ, Ashley SW, Whang EE. 2004. Systemic siRNA-mediated  
1100 gene silencing: a new approach to targeted therapy of cancer. *Ann Surg* 240:667-74; discussion  
1101 675-6.
- 1102 63. Gaur P, Ranjan P, Sharma S, Patel JR, Bowzard JB, Rahman SK, Kumari R, Gangappa S, Katz JM,  
1103 Cox NJ, Lal RB, Sambhara S, Lal SK. 2012. Influenza A virus neuraminidase protein enhances cell  
1104 survival through interaction with carcinoembryonic antigen-related cell adhesion molecule 6  
1105 (CEACAM6) protein. *J Biol Chem* 287:15109-17.
- 1106 64. Kolla V, Gonzales LW, Bailey NA, Wang P, Angampalli S, Godinez MH, Madesh M, Ballard PL.  
1107 2009. Carcinoembryonic cell adhesion molecule 6 in human lung: regulated expression of a  
1108 multifunctional type II cell protein. *Am J Physiol Lung Cell Mol Physiol* 296:L1019-30.
- 1109 65. Riley CJ, Engelhardt KP, Saldanha JW, Qi W, Cooke LS, Zhu Y, Narayan ST, Shakalya K, Croce KD,  
1110 Georgiev IG, Nagle RB, Garewal H, Von Hoff DD, Mahadevan D. 2009. Design and activity of a  
1111 murine and humanized anti-CEACAM6 single-chain variable fragment in the treatment of  
1112 pancreatic cancer. *Cancer Res* 69:1933-40.
- 1113 66. Tian C, Zhang B, Ge C. 2020. Effect of CEACAM6 silencing on the biological behavior of human  
1114 gallbladder cancer cells. *Oncol Lett* 20:2677-2688.
- 1115 67. Kanderova V, Hrusak O, Kalina T. 2010. Aberrantly expressed CEACAM6 is involved in the  
1116 signaling leading to apoptosis of acute lymphoblastic leukemia cells. *Exp Hematol* 38:653-660 e1.
- 1117 68. Aleandri M, Conte MP, Simonetti G, Panella S, Celestino I, Checconi P, Marazzato M, Longhi C,  
1118 Goldoni P, Nicoletti M, Barnich N, Palamara AT, Schippa S, Nencioni L. 2015. Influenza A virus  
1119 infection of intestinal epithelial cells enhances the adhesion ability of Crohn's disease associated  
1120 *Escherichia coli* strains. *PLoS One* 10:e0117005.
- 1121 69. Klaile E, Klassert TE, Scheffrahn I, Muller MM, Heinrich A, Heyl KA, Dienemann H, Grunewald C,  
1122 Bals R, Singer BB, Slevogt H. 2013. Carcinoembryonic antigen (CEA)-related cell adhesion  
1123 molecules are co-expressed in the human lung and their expression can be modulated in  
1124 bronchial epithelial cells by non-typable *Haemophilus influenzae*, *Moraxella catarrhalis*, TLR3,  
1125 and type I and II interferons. *Respir Res* 14:85.
- 1126 70. Negroni A, Costanzo M, Vitali R, Superti F, Bertuccini L, Tinari A, Minelli F, Di Nardo G, Nuti F,  
1127 Pierdomenico M, Cucchiara S, Stronati L. 2012. Characterization of adherent-invasive *Escherichia*  
1128 *coli* isolated from pediatric patients with inflammatory bowel disease. *Inflamm Bowel Dis*  
1129 18:913-24.
- 1130 71. Barnich N, Carvalho FA, Glasser AL, Darcha C, Jantschkeff P, Allez M, Peeters H, Bommelaer G,  
1131 Desreumaux P, Colombel JF, Darfeuille-Michaud A. 2007. CEACAM6 acts as a receptor for  
1132 adherent-invasive *E. coli*, supporting ileal mucosa colonization in Crohn disease. *J Clin Invest*  
1133 117:1566-74.

- 1134 72. Carvalho FA, Barnich N, Sivignon A, Darcha C, Chan CH, Stanners CP, Darfeuille-Michaud A. 2009.  
1135 Crohn's disease adherent-invasive *Escherichia coli* colonize and induce strong gut inflammation  
1136 in transgenic mice expressing human CEACAM. *J Exp Med* 206:2179-89.
- 1137 73. Shikotra A, Choy DF, Siddiqui S, Arthur G, Nagarkar DR, Jia G, Wright AK, Ohri CM, Doran E, Butler  
1138 CA, Hargadon B, Abbas AR, Jackman J, Wu LC, Heaney LG, Arron JR, Bradding P. 2017. A  
1139 CEACAM6-High Airway Neutrophil Phenotype and CEACAM6-High Epithelial Cells Are Features of  
1140 Severe Asthma. *J Immunol* 198:3307-3317.
- 1141 74. Klaile E, Vorontsova O, Sigmundsson K, Muller MM, Singer BB, Ofverstedt LG, Svensson S,  
1142 Skoglund U, Obrink B. 2009. The CEACAM1 N-terminal Ig domain mediates cis- and trans-binding  
1143 and is essential for allosteric rearrangements of CEACAM1 microclusters. *J Cell Biol* 187:553-67.
- 1144 75. Klassert TE, Brauer J, Holzer M, Stock M, Riege K, Zubiria-Barrera C, Muller MM, Rummeler S,  
1145 Skerka C, Marz M, Slevogt H. 2017. Differential Effects of Vitamins A and D on the Transcriptional  
1146 Landscape of Human Monocytes during Infection. *Sci Rep* 7:40599.
- 1147 76. Klassert TE, Hanisch A, Brauer J, Klaile E, Heyl KA, Mansour MK, Tam JM, Vyas JM, Slevogt H.  
1148 2014. Modulatory role of vitamin A on the *Candida albicans*-induced immune response in human  
1149 monocytes. *Med Microbiol Immunol* 203:415-24.
- 1150 77. Afgan E, Baker D, Batut B, van den Beek M, Bouvier D, Cech M, Chilton J, Clements D, Coraor N,  
1151 Gruning BA, Guerler A, Hillman-Jackson J, Hiltemann S, Jalili V, Rasche H, Soranzo N, Goecks J,  
1152 Taylor J, Nekrutenko A, Blankenberg D. 2018. The Galaxy platform for accessible, reproducible  
1153 and collaborative biomedical analyses: 2018 update. *Nucleic Acids Res* 46:W537-W544.
- 1154 78. Martin M. 2011. Cutadapt removes adapter sequences from high-throughput sequencing reads.  
1155 2011 17:3.
- 1156 79. Dobin A, Davis CA, Schlesinger F, Drenkow J, Zaleski C, Jha S, Batut P, Chaisson M, Gingeras TR.  
1157 2013. STAR: ultrafast universal RNA-seq aligner. *Bioinformatics* 29:15-21.
- 1158 80. Love MI, Huber W, Anders S. 2014. Moderated estimation of fold change and dispersion for RNA-  
1159 seq data with DESeq2. *Genome Biol* 15:550.
- 1160 81. Robinson MD, McCarthy DJ, Smyth GK. 2010. edgeR: a Bioconductor package for differential  
1161 expression analysis of digital gene expression data. *Bioinformatics* 26:139-40.
- 1162 82. Ashburner M, Ball CA, Blake JA, Botstein D, Butler H, Cherry JM, Davis AP, Dolinski K, Dwight SS,  
1163 Eppig JT, Harris MA, Hill DP, Issel-Tarver L, Kasarskis A, Lewis S, Matese JC, Richardson JE,  
1164 Ringwald M, Rubin GM, Sherlock G. 2000. Gene ontology: tool for the unification of biology. The  
1165 Gene Ontology Consortium. *Nat Genet* 25:25-9.
- 1166 83. The Gene Ontology C. 2019. The Gene Ontology Resource: 20 years and still GOing strong.  
1167 *Nucleic Acids Res* 47:D330-D338.
- 1168 84. Mi H, Muruganujan A, Ebert D, Huang X, Thomas PD. 2019. PANTHER version 14: more genomes,  
1169 a new PANTHER GO-slim and improvements in enrichment analysis tools. *Nucleic Acids Res*  
1170 47:D419-D426.
- 1171 85. Remmele CW, Luther CH, Balkenhol J, Dandekar T, Muller T, Dittrich MT. 2015. Integrated  
1172 inference and evaluation of host-fungi interaction networks. *Front Microbiol* 6:764.
- 1173 86. Orchard S, Kerrien S, Abbani S, Aranda B, Bhate J, Bidwell S, Bridge A, Briganti L, Brinkman FS,  
1174 Cesareni G, Chatr-aryamontri A, Chautard E, Chen C, Dumousseau M, Goll J, Hancock RE, Hannick  
1175 LI, Jurisica I, Khadake J, Lynn DJ, Mahadevan U, Perfetto L, Raghunath A, Ricard-Blum S, Roechert  
1176 B, Salwinski L, Stumpflen V, Tyers M, Uetz P, Xenarios I, Hermjakob H. 2012. Protein interaction  
1177 data curation: the International Molecular Exchange (IMEx) consortium. *Nat Methods* 9:345-50.

- 1178 87. Aranda B, Blankenburg H, Kerrien S, Brinkman FS, Ceol A, Chautard E, Dana JM, De Las Rivas J,  
1179 Dumousseau M, Galeota E, Gaulton A, Goll J, Hancock RE, Isserlin R, Jimenez RC, Kerssemakers J,  
1180 Khadake J, Lynn DJ, Michaut M, O'Kelly G, Ono K, Orchard S, Prieto C, Razick S, Rigina O, Salwinski  
1181 L, Simonovic M, Velankar S, Winter A, Wu G, Bader GD, Cesareni G, Donaldson IM, Eisenberg D,  
1182 Kleywegt GJ, Overington J, Ricard-Blum S, Tyers M, Albrecht M, Hermjakob H. 2011. PSICQUIC  
1183 and PSIScore: accessing and scoring molecular interactions. *Nat Methods* 8:528-9.
- 1184 88. Beisser D, Klau GW, Dandekar T, Muller T, Dittrich MT. 2010. BioNet: an R-Package for the  
1185 functional analysis of biological networks. *Bioinformatics* 26:1129-30.
- 1186 89. Dittrich MT, Klau GW, Rosenwald A, Dandekar T, Muller T. 2008. Identifying functional modules  
1187 in protein-protein interaction networks: an integrated exact approach. *Bioinformatics* 24:i223-  
1188 31.
- 1189 90. Shannon P, Markiel A, Ozier O, Baliga NS, Wang JT, Ramage D, Amin N, Schwikowski B, Ideker T.  
1190 2003. Cytoscape: a software environment for integrated models of biomolecular interaction  
1191 networks. *Genome Res* 13:2498-504.
- 1192 91. Raudvere U, Kolberg L, Kuzmin I, Arak T, Adler P, Peterson H, Vilo J. 2019. g:Profiler: a web server  
1193 for functional enrichment analysis and conversions of gene lists (2019 update). *Nucleic Acids Res*  
1194 47:W191-W198.
- 1195 92. Kanehisa M, Furumichi M, Tanabe M, Sato Y, Morishima K. 2017. KEGG: new perspectives on  
1196 genomes, pathways, diseases and drugs. *Nucleic Acids Res* 45:D353-D361.
- 1197 93. UniProt C. 2019. UniProt: a worldwide hub of protein knowledge. *Nucleic Acids Res* 47:D506-  
1198 D515.
- 1199 94. Huynh-Thu VA, Irrthum A, Wehenkel L, Geurts P. 2010. Inferring regulatory networks from  
1200 expression data using tree-based methods. *PLoS One* 5.
- 1201 95. Kim S. 2015. ppcor: An R Package for a Fast Calculation to Semi-partial Correlation Coefficients.  
1202 *Commun Stat Appl Methods* 22:665-674.
- 1203 96. Szklarczyk D, Gable AL, Lyon D, Junge A, Wyder S, Huerta-Cepas J, Simonovic M, Doncheva NT,  
1204 Morris JH, Bork P, Jensen LJ, Mering CV. 2019. STRING v11: protein-protein association networks  
1205 with increased coverage, supporting functional discovery in genome-wide experimental  
1206 datasets. *Nucleic Acids Res* 47:D607-D613.
- 1207 97. Stark C, Breitkreutz BJ, Reguly T, Boucher L, Breitkreutz A, Tyers M. 2006. BioGRID: a general  
1208 repository for interaction datasets. *Nucleic Acids Res* 34:D535-9.
- 1209 98. Alexa A, Rahnenfuhrer J. 2020. Enrichment Analysis for Gene Ontology. R package version  
1210 2.42.0., <https://bioconductor.org/packages/release/bioc/html/topGO.html>.
- 1211 99. Carlson M. 2019. org.Hs.eg.db: Genome wide annotation for Human. R package version 3.8.2.,  
1212 <https://bioconductor.org/packages/release/data/annotation/html/org.Hs.eg.db.html>.
- 1213 100. Karl S, Dandekar T. 2013. Jimena: efficient computing and system state identification for genetic  
1214 regulatory networks. *BMC Bioinformatics* 14:306.
- 1215 101. Yang M, Rajeeve K, Rudel T, Dandekar T. 2019. Comprehensive Flux Modeling of Chlamydia  
1216 trachomatis Proteome and qRT-PCR Data Indicate Biphasic Metabolic Differences Between  
1217 Elementary Bodies and Reticulate Bodies During Infection. *Front Microbiol* 10:2350.
- 1218 102. Srivastava M, Bencurova E, Gupta SK, Weiss E, Loffler J, Dandekar T. 2019. *Aspergillus fumigatus*  
1219 Challenged by Human Dendritic Cells: Metabolic and Regulatory Pathway Responses Testify a  
1220 Tight Battle. *Front Cell Infect Microbiol* 9:168.

- 1221 103. Cecil A, Gentschev I, Adelfinger M, Dandekar T, Szalay AA. 2019. Vaccinia virus injected human  
1222 tumors: oncolytic virus efficiency predicted by antigen profiling analysis fitted boolean models.  
1223 Bioengineered 10:190-196.
- 1224  
1225  
1226  
1227

## Figure 1

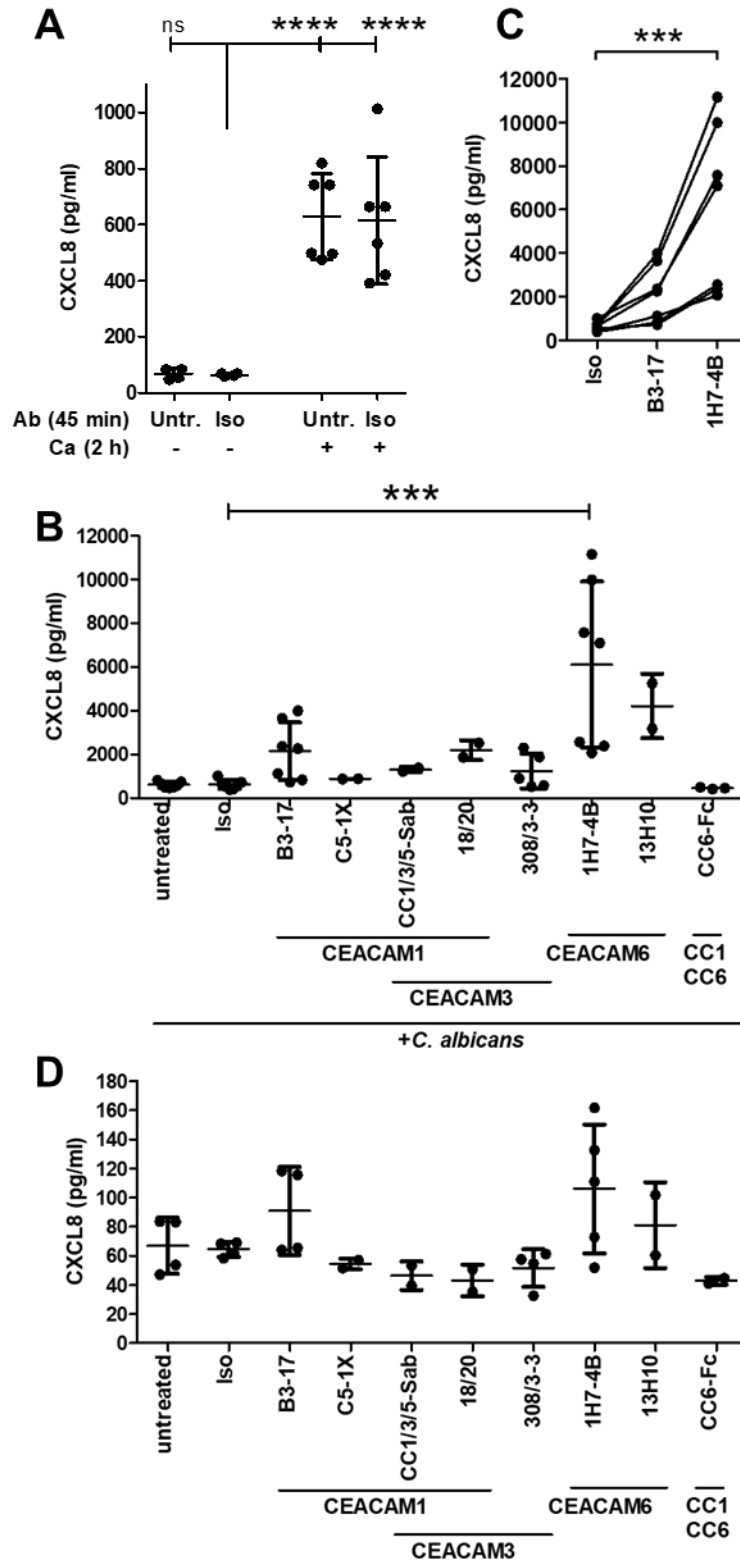

1228  
 1229 **Figure 1: Altered *C. albicans*-induced CXCL8 release by neutrophil treatment with anti-**  
 1230 **CEACAM6 antibody.** Human neutrophils were left untreated or were incubated with 10  $\mu\text{g/ml}$   
 1231 mouse IgG1 isotype control antibody (clone MOPC-21), or monoclonal CEACAM-specific mouse

1232 monoclonal IgG1 antibodies for 45 min and were consecutively incubated with or without live  
1233 *C. albicans* yeast cells (MOI 1) for 2 h. Antibody clones and their specific (cross-) reactivities for  
1234 CEACAM1, CEACAM3 and CEACAM6 are indicated in (B) and (D). Cell culture supernatants  
1235 were harvested and analyzed for CXCL8 concentrations in 2-7 independent experiments for the  
1236 different treatment groups, represented by the single dots in the graphs. (A) CXCL8 release in  
1237 untreated and isotype-treated neutrophils without and with *C. albicans* stimulation. (B) CXCL8  
1238 release in *C. albicans*-stimulated cells including all anti-CEACAM antibody treatments. (C)  
1239 Samples pre-treated with isotype, B3-17 and 1H7-4B from (B) were plotted with linked samples  
1240 from the same donor. Note the donor-independent relative increase of the CXCL8 response to  
1241 *C. albicans* treatment after pre-stimulation with the CEACAM1- and the CEACAM6-  
1242 monospecific antibody, respectively. (D) CXCL8 release after antibody treatments in absence of  
1243 *C. albicans*. Statistical analyses were performed by One-Way ANOVA with Bonferroni post-test.  
1244



## Figure 2

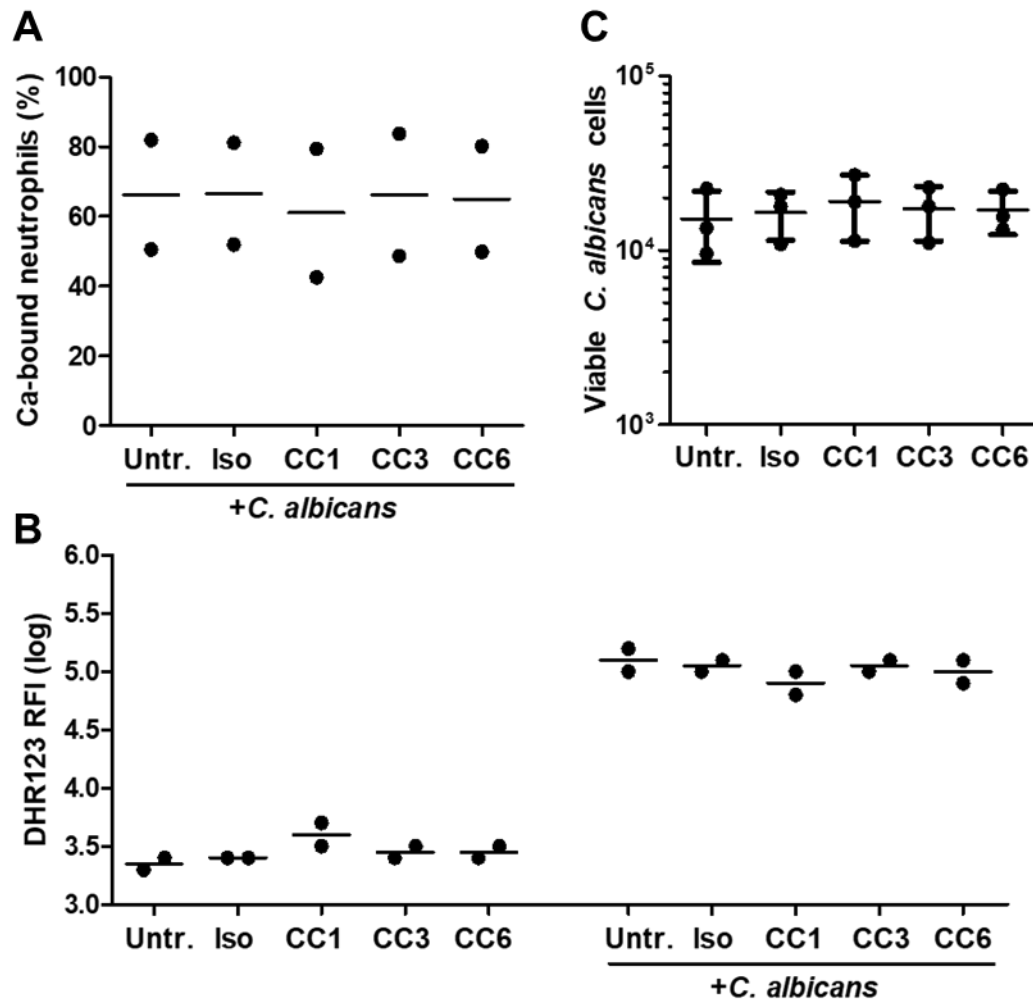

1245  
1246 **Figure 2: No alterations of *C. albicans* binding, ROS production and *C. albicans* killing by**  
1247 **human neutrophils in response to anti-CEACAM antibodies.** (A, B) Human neutrophils were  
1248 stained for CD11b and left untreated or were incubated with 10 µg/ml isotype control antibody  
1249 (clone MOPC-21), or monoclonal antibodies B3-17 (CC1), 308/3-3 (CC3), or 1H7-4B (CC6) for  
1250 45 min and were consecutively incubated with (A, B) or without (B) live, APC-labeled *C. albicans*  
1251 yeast cells (MOI 1) for 20 min. Cells were then analyzed by flow cytometry for the percentage of  
1252 *C. albicans*-bound neutrophils and the ROS production by DHR123. The graphs show the  
1253 percentage of *C. albicans*-bound granulocytes (A), the logarithmized fluorescent signal of the  
1254 DHR123 dye (B), and the respective means from two independent experiments. (C) 2×10<sup>5</sup> human  
1255 neutrophils (2×10<sup>6</sup>/ml) were left untreated or were incubated with 10 µg/ml isotype control  
1256 antibody (clone MOPC-21), or monoclonal antibodies B3-17 (CC1), 308/3-3 (CC3), or 1H7-4B  
1257 (CC6) for 45 min and were consecutively incubated with live *C. albicans* yeast cells (MOI 1) for  
1258 30 min. Viable *C. albicans* cells were quantified by XTT assay. The graph shows mean and SD  
1259 from three independent experiments (Statistics: Repeated Measures ANOVA; no significant  
1260 differences).

1261

### Figure 3

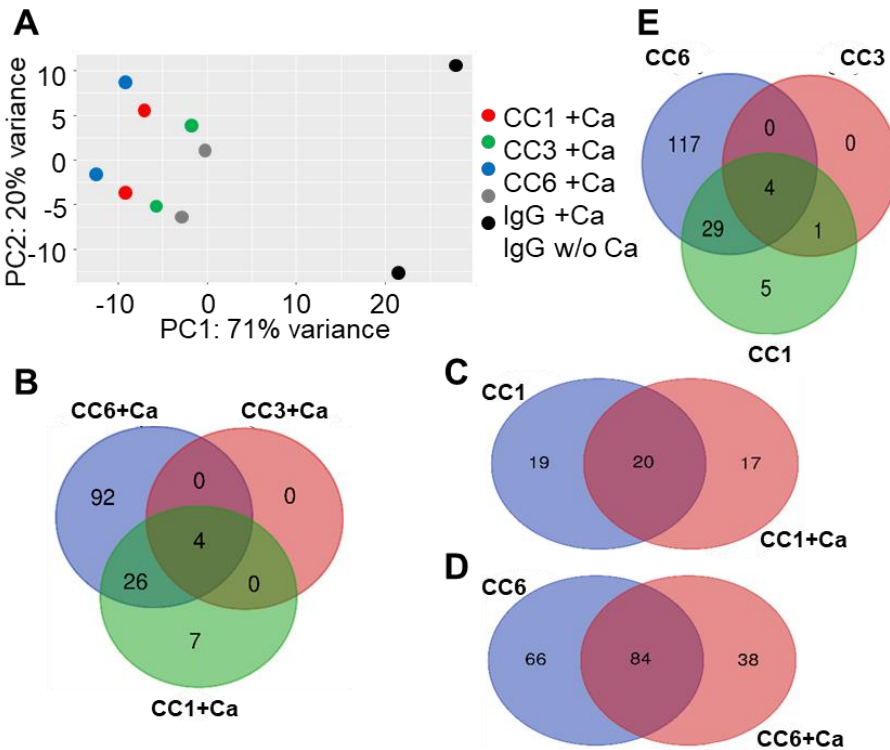

1262  
 1263 **Figure 3: Altered Ca-induced neutrophil transcriptional response by priming with anti-**  
 1264 **CEACAM antibodies.** Human neutrophils were left untreated or were incubated with 10  $\mu$ g/ml  
 1265 isotype control antibody (clone MOPC-21), or monoclonal antibodies B3-17 (CC1), 308/3-3  
 1266 (CC3), or 1H7-4B (CC6) for 45 min and were consecutively incubated with or without live  
 1267 *C. albicans* yeast cells (MOI 1) for 2 h; mRNA was extracted and analyzed by sequencing. (A)  
 1268 PCA analysis of all antibody-treated samples in presence of *C. albicans* and IgG-treated control  
 1269 cells without *C. albicans* stimulation. Please refer to Figure S1A for a PCA including all samples.  
 1270 (B, C, D, E) Data presented in Figure 3A and Tables S1 and S3 were further analyzed for the  
 1271 CEACAM-specific responses by comparing shared differentially expressed genes (DEGs) from the  
 1272 different treatment groups. Only significantly regulated genes (adjusted p-value <0.05, fold-change  
 1273 at least  $\pm 2$ ) were included. Note that for Venn diagrams, both, protein-coding and non-protein-  
 1274 coding genes were included. (B) Venn diagram of DEGs induced by anti-CEACAM antibody  
 1275 treatment and *C. albicans*-stimulation (IgG-treated neutrophils with *C. albicans* stimulation versus  
 1276 CC1-, CC3-, or CC6-treated neutrophils with *C. albicans* stimulation, respectively). Please refer to  
 1277 Table S3 for the DEGs within the partitions of the Venn diagram. (C) Venn diagram of DEGs  
 1278 regulated in a *C. albicans*-specific manner by CEACAM1 treatment alone (CC1) or in presence of  
 1279 *C. albicans* (CC1+Ca). Please refer to Table S4 for the classification of the DEGs into the partitions  
 1280 of the Venn diagram. (D) Venn diagram of DEGs regulated in a *C. albicans*-specific manner by  
 1281 CEACAM treatment alone (CC6) or in presence of *C. albicans* (CC6+Ca). Please refer to Table  
 1282 S5 for the classification of the DEGs into the partitions of the Venn diagram. (E) Venn diagram of  
 1283 differentially expressed genes (DEGs) induced by antibody stimulations alone (IgG-treated  
 1284 neutrophils versus CC1-, CC3-, or CC6-treated neutrophils, respectively). Please refer to Table S6  
 1285 for the classification of the DEGs into the partitions of the Venn diagram.

## Figure 4

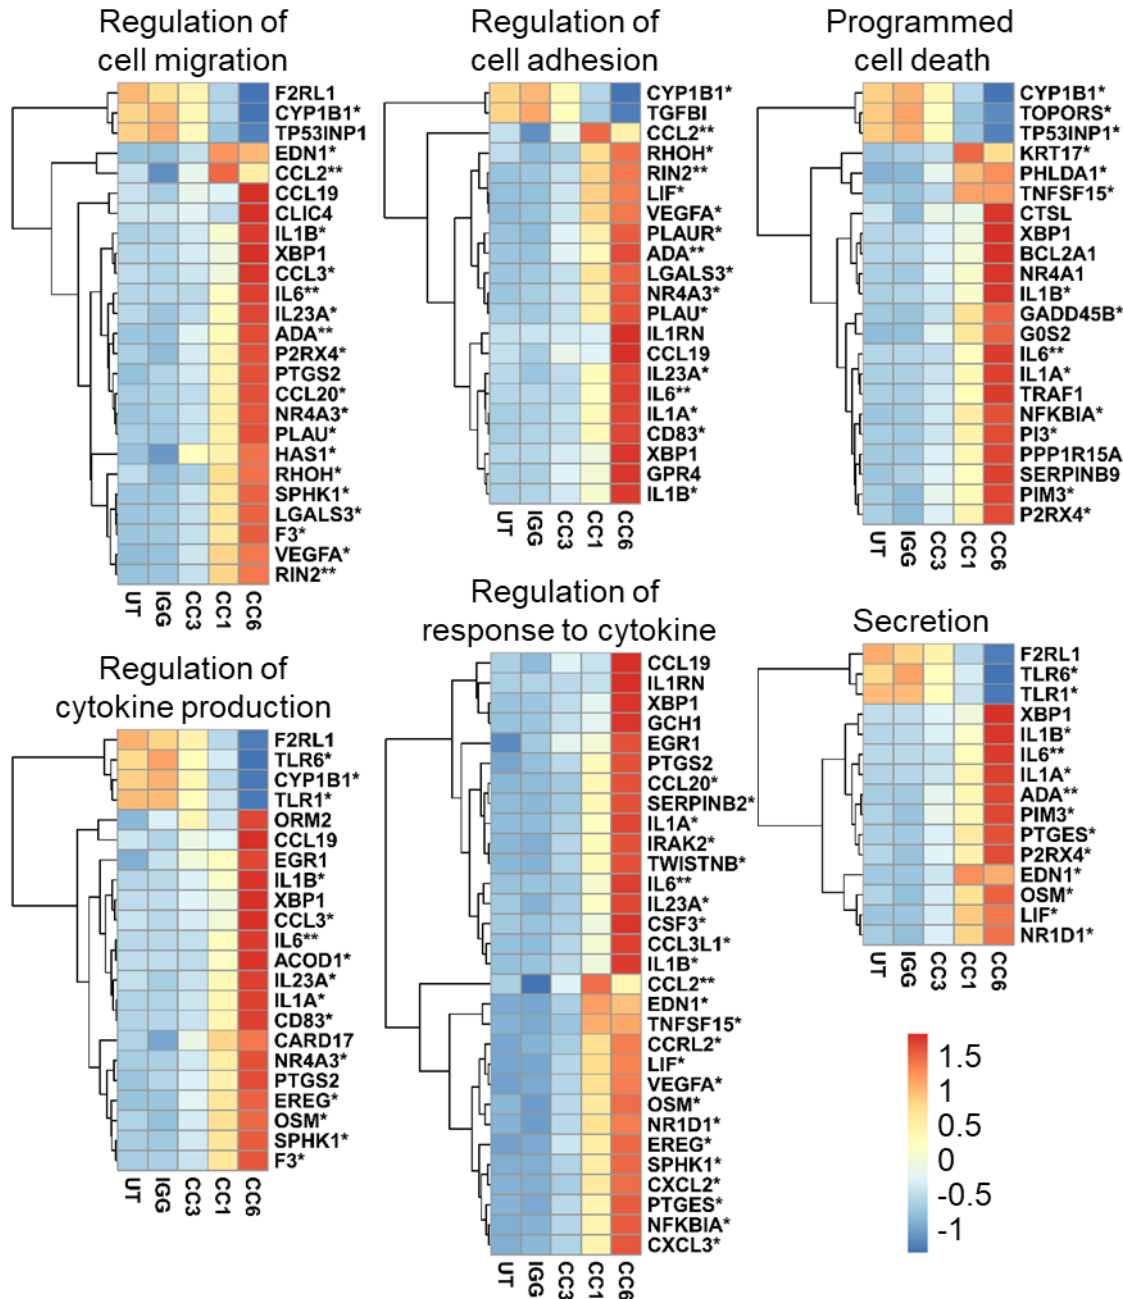

1286  
1287 **Figure 4: CEACAM6-specific transcriptional responses of neutrophils in the presence of**  
1288 ***C. albicans* and comparison to CEACAM1 and CEACAM3 antibody ligation experiments.**  
1289 Heat maps display DEGs after CEACAM6 (CC6) treatment in presence of *C. albicans* stimulation  
1290 from major enriched GO categories (adjusted p-value < 0.05 and fold-change >±2; see also Table  
1291 S1 for a complete list with fold-changes of all genes differentially expressed after CC6 treatment).  
1292 The relative expression of each gene is shown for all treatment groups with *C. albicans* stimulation  
1293 (untreated, UT; isotype control antibody-treated, IGG; B3-17-treated, CC1; 308/3-3-treated, CC3;  
1294 1H7-4B-treated, CC6). Each row was normalized (mean = 0) and scaled (standard deviation = 1);  
1295 \*also padj < 0.05 for CC1, \*\* also padj < 0.05 for CC3.  
1296

## Figure 5

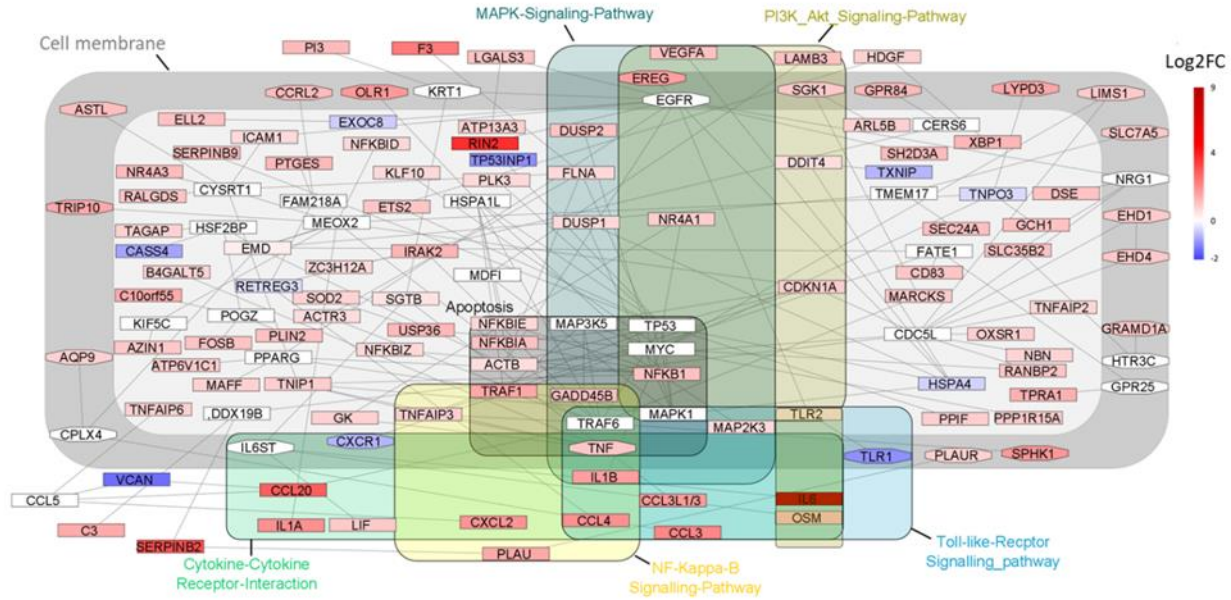

1297  
1298 **Figure 5. Integrated network analysis of CEACAM6-regulated genes in presence of**  
1299 ***C. albicans*.** Based on gene expression profiles, the optimally CEACAM6-responsive network  
1300 module in presence of *C. albicans* has been identified. Subsequent KEGG enrichment analysis  
1301 detected key signaling pathways of CEACAM6-antibody treated neutrophils stimulated with  
1302 *C. albicans*, including apoptosis as well as NF-kappa-B and TLR signaling (pathway associated  
1303 genes are highlighted and framed).  
1304

## Figure 6

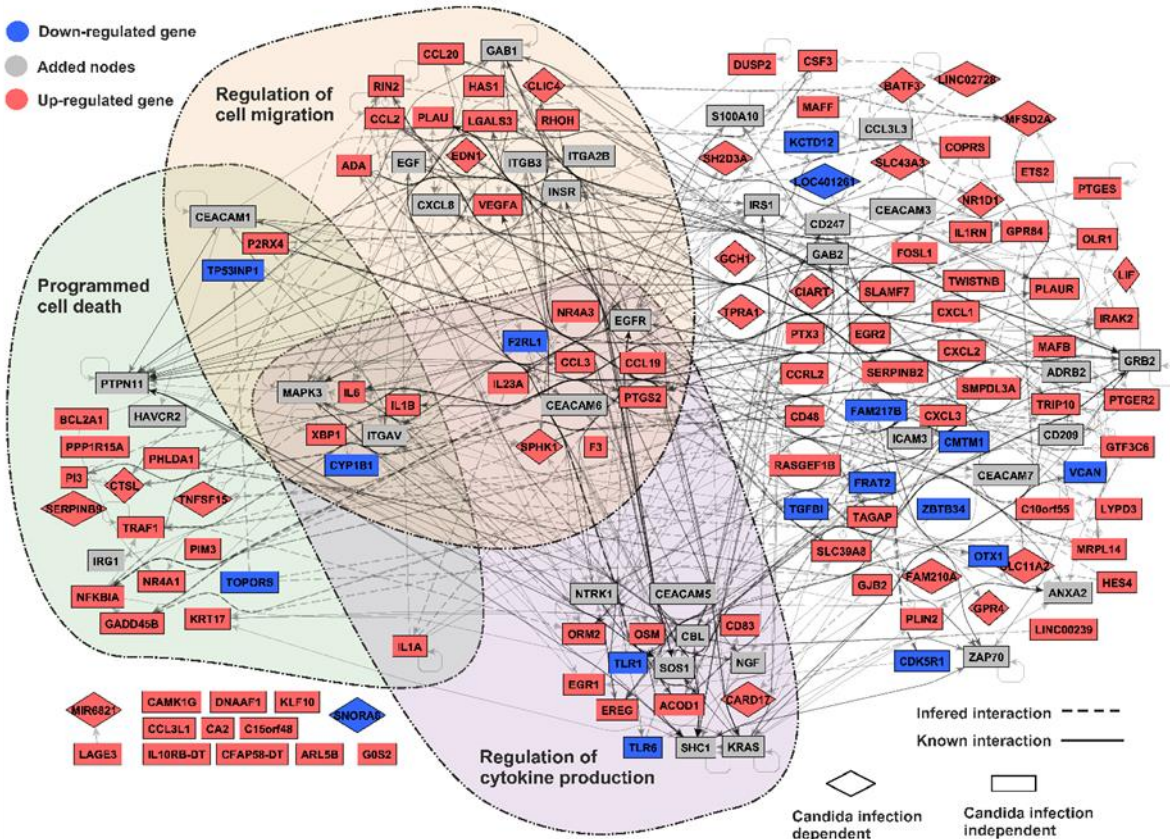

1305  
 1306 **Figure 6: Cell function-centered network analysis of CEACAM6-regulated genes in presence**  
 1307 **of *C. albicans*.** Signaling network assembled from the DEGs in CEACAM6-treated neutrophils in  
 1308 presence of *C. albicans* stimulation (blue and red nodes, Table S1) and known interactors of  
 1309 CEACAM family receptors (gray nodes). Interactions are inferred from the RNA-seq samples  
 1310 (dashed lines) or obtained from interaction databases (solid lines). Nodes belonging to significantly  
 1311 enriched GO terms important to neutrophil responses are clustered and framed.

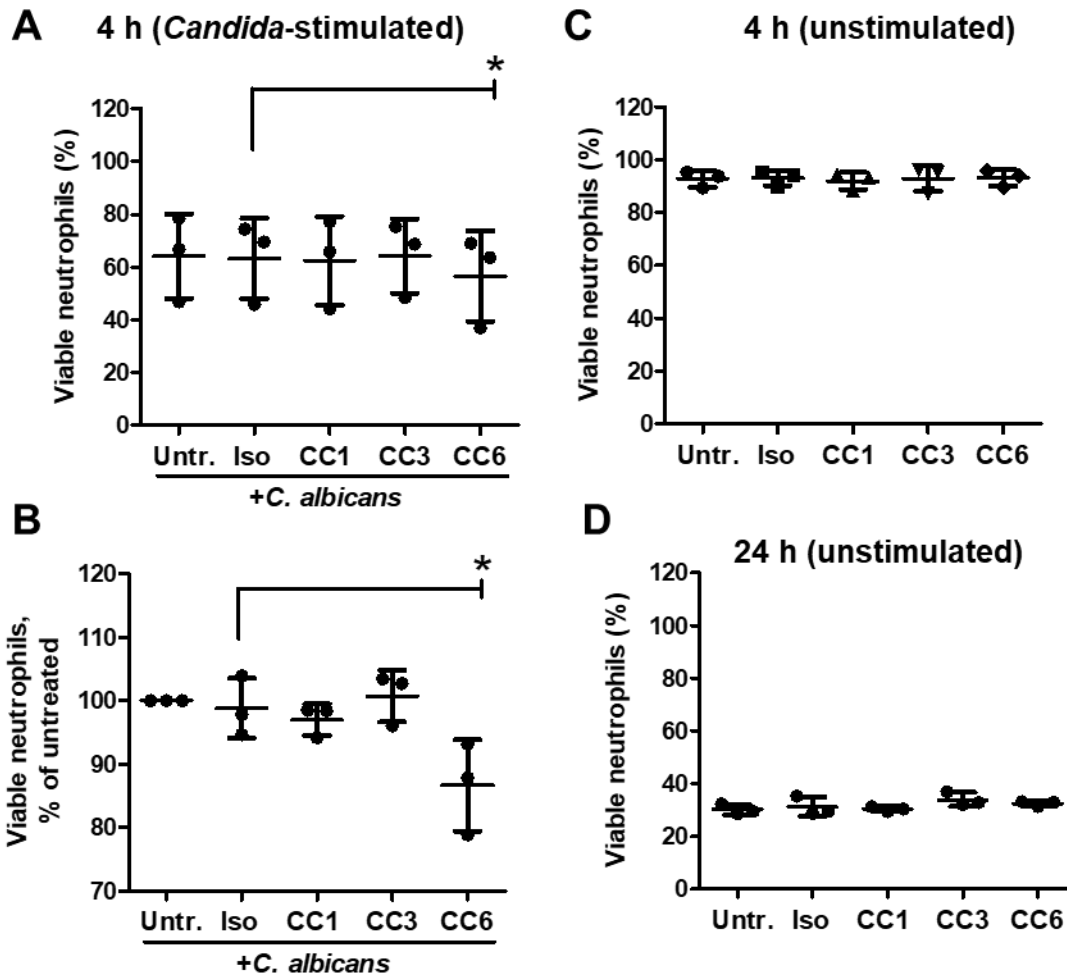

1312  
1313 **Figure 7: Verification of the predicted altered apoptosis of human neutrophils after**  
1314 **stimulation with *C. albicans* by CEACAM6 ligation.** Human neutrophils were left untreated or  
1315 were incubated with the following antibodies: isotype control (Iso), B3-17 (CC1), 308/3-3 (CC3)  
1316 or 1H7-4B (CC6) for 45 min. Afterwards, cells were incubated with or without live *C. albicans*  
1317 yeast cells (MOI 1) for 4 h (A, B, C) or for 24 h (D). Viability of human neutrophils after 4 h of  
1318 *C. albicans*-stimulation was determined by Annexin V and propidium iodide staining with  
1319 subsequent flow cytometric analysis. (A, C, D) graphs display the percentage of viable neutrophils  
1320 (% of total neutrophils). (B) The graph displays the samples shown in (A) as percentage of viable  
1321 neutrophils compared to untreated cells in each experiment (viable untreated cells = 100%) to  
1322 highlight the donor-independent relative effect of CEACAM6 treatment on *C. albicans*-induced  
1323 apoptosis. Statistical analysis was performed by Repeated Measures ANOVA and Bonferroni post-  
1324 test.

## Figure 8

A

|                                                                                   | Treatment |      |       |
|-----------------------------------------------------------------------------------|-----------|------|-------|
|                                                                                   | CC1       | CC3  | CC6   |
| Fold-change IL1B without Candida stimulation                                      | 2.42*     | 1.62 | 6.49* |
| Fold-change IL1B with Candida stimulation<br>(2.25* fold-change by candida alone) | 1.99*     | 1.38 | 4.64* |

B

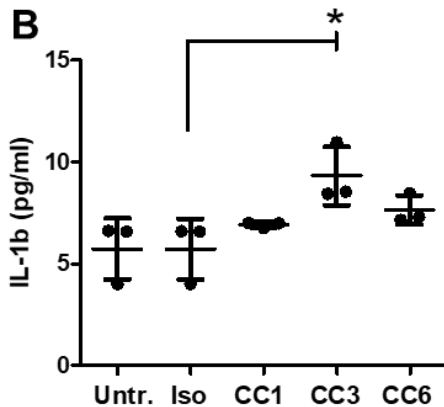

C

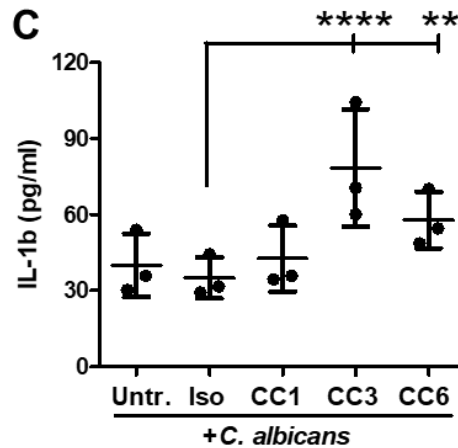

1325  
1326 **Figure 8: *IL1B* transcription and IL-1 $\beta$  secretion *in vitro*.** Human neutrophils were left untreated  
1327 or were incubated with the following antibodies: isotype control (Iso), B3-17 (CC1), 308/3-3 (CC3)  
1328 or 1H7-4B (CC6) for 45 min. Afterwards, cells were incubated with or without live *C. albicans*  
1329 yeast cells (MOI 1) for 2 h (A) or 21 h (B, C). (A) mRNA was extracted after 2 h and analyzed by  
1330 sequencing. Fold-changes of the *IL1B* gene expression compared to isotype treatment in absence  
1331 or presence of *C. albicans* stimulation, respectively, are shown. Fold-changes with an adjusted p-  
1332 value<0.05 are marked with an asterisk. (B, C) Supernatants were collected after 21 h and analyzed  
1333 for IL-1 $\beta$  concentrations (sensitivity: 4 pg/ml). Statistical analysis was performed by Repeated  
1334 Measures ANOVA and Bonferroni post-test; samples below the detection range were set to the  
1335 detection limit for statistical analysis.

**Figure 9**

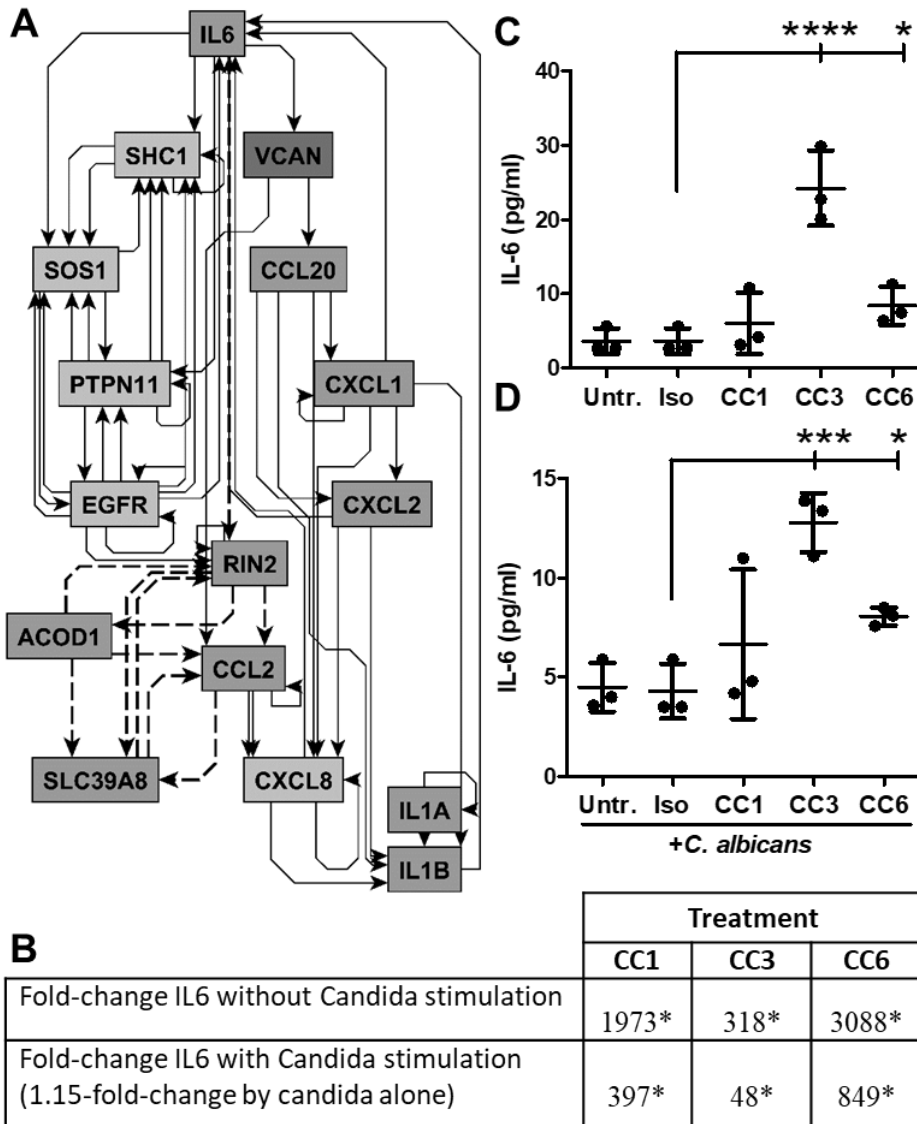

1336  
1337  
1338  
1339  
1340  
1341  
1342  
1343  
1344  
1345  
1346  
1347  
1348  
1349

**Figure 9: Predicted and experimentally measured IL-6 secretion in anti-CEACAM3-treated samples.** (A) Sub-network of *IL1B* induction by IL6 signaling. The network shown is a subgraph from the network displayed in Figure 5. All paths between IL6 and *IL1B* up to 7 nodes long were extracted; dashed lines: inferred interactions from our network analysis, solid lines: interactions obtained from data bases. (B-D) Human neutrophils were left untreated or were incubated with the following antibodies: isotype control (Iso), B3-17 (CC1), 308/3-3 (CC3) or 1H7-4B (CC6) for 45 min. Afterwards, cells were incubated with or without live *C. albicans* yeast cells (MOI 1) for 2 h (B) or 21 h (C, D). (B) mRNA was extracted after 2 h and analyzed by sequencing. Fold-changes of the *IL6* gene expression compared to isotype treatment in absence or presence of *C. albicans* stimulation, respectively, are shown. Fold-changes with an adjusted p-value<0.05 are marked with an asterisk. (C, D) Supernatants were collected after 21 h and analyzed for IL-6 concentrations (sensitivity: 2 pg/ml). Statistical analysis was performed by Repeated Measure ANOVA and Bonferroni post-test.



## Supplemental Figure 1

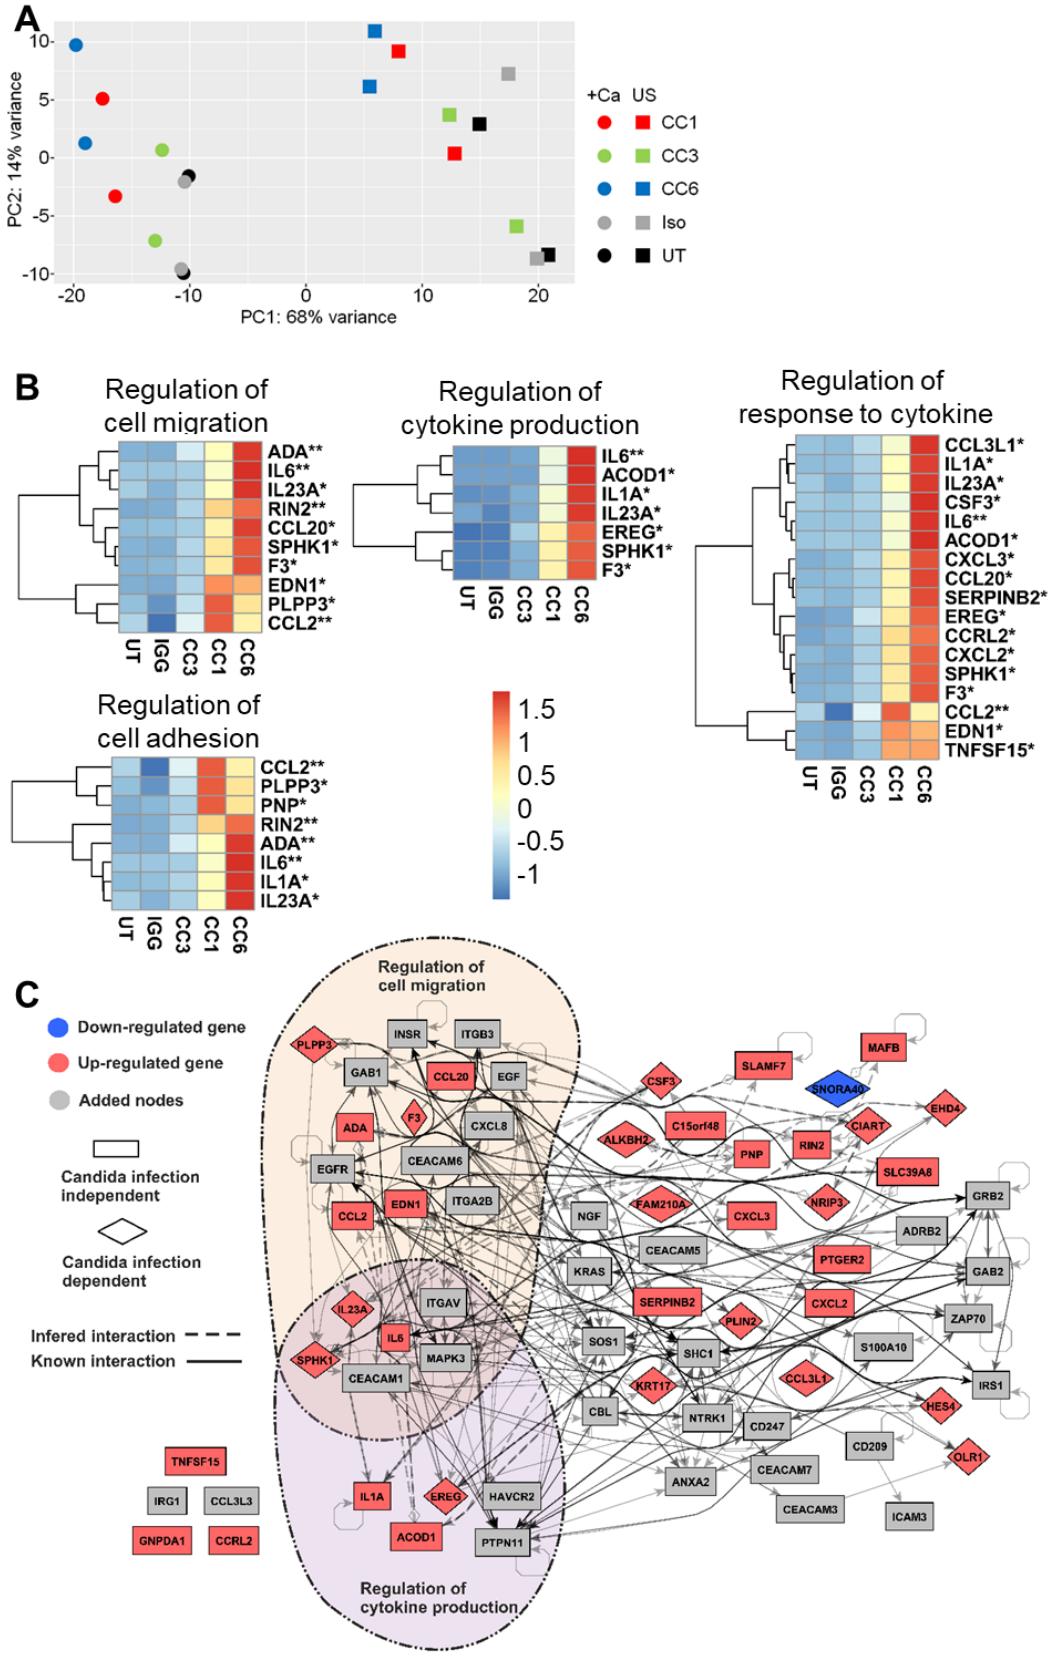

1350  
 1351 **Figure S1: Additional analyses of transcriptomic data.** (A) Principal component analysis (PCA)  
 1352 of all samples (untreated, UT; isotype control antibody-treated, Iso; B3-17-treated, CC1, 308/3-3-

1353 treated, CC3; 1H7-4B-treated, CC6) without (US) and with *C. albicans* stimulation (+Ca)  
1354 presented in Figure 3. (B) Altered *C. albicans*-induced neutrophil transcriptional response after  
1355 treatment with anti-CEACAM1 antibody. Heat maps display DEGs after CEACAM1 (CC1)  
1356 treatment in presence of *C. albicans* from major enriched GO categories (adjusted p-value < 0.05  
1357 and fold-change >±2; see also Table S1 for a complete list with fold-changes of all DEGs). The  
1358 relative expression of each gene is shown for all treatment groups with *C. albicans* stimulation  
1359 (untreated, UT; isotype control antibody-treated, IGG; B3-17-treated, CC1; 308/3-3-treated, CC3;  
1360 1H7-4B-treated, CC6). Each row was normalized (mean = 0) and scaled (standard deviation = 1);  
1361 \*also padj < 0.05 for CC6, \*\* also padj < 0.05 for CC3. Note that “programmed cell death” and  
1362 “secretion” were not among the enriched GO categories. (C) Signaling network assembled from  
1363 the DEGs in CC1-treated neutrophils in presence of *C. albicans* stimulation (blue and red nodes,  
1364 Table S1) and known interactors of CEACAM family receptors (gray nodes). Interactions are  
1365 inferred from the RNA-seq samples (dashed lines) or obtained from interaction databases (solid  
1366 lines). Nodes belonging to significantly enriched GO terms important to neutrophil responses are  
1367 clustered and framed.

## Supplemental Figure 2

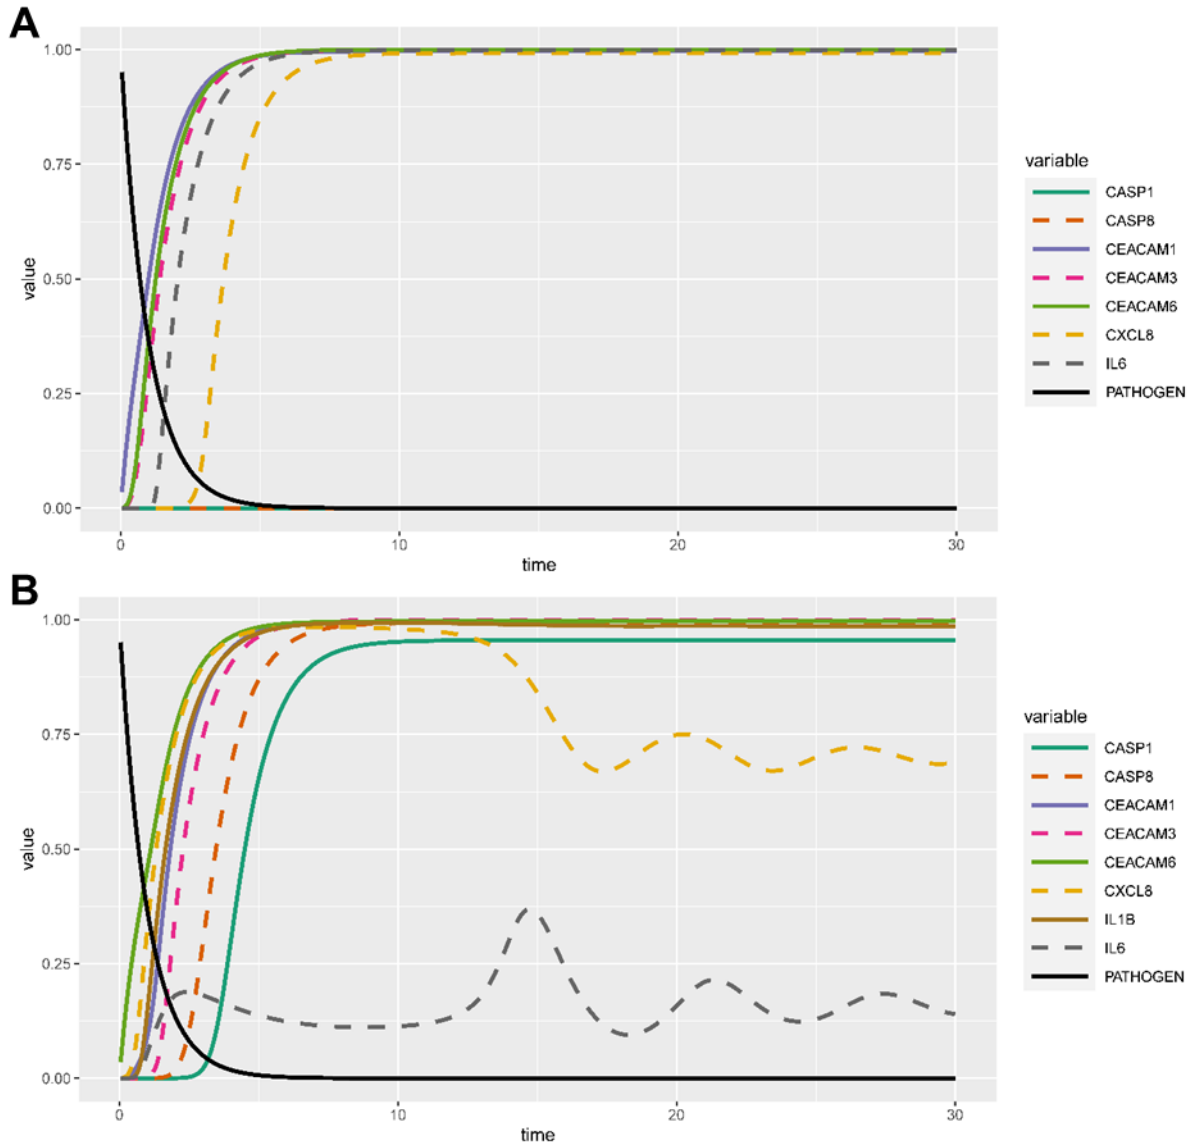

1368  
1369 **Figure S2. Result curves of the dynamical simulation of Figs. 5 and S1C.** The whole networks  
1370 around the CEACAM receptors and each protein activation pathway was modelled and considered  
1371 in the dynamical simulation of the pathogen stimulation effects. For the simulations the extra node  
1372 “PATHOGEN” (for pathogen *C. albicans*) was added to the network; this node is activating and  
1373 linked to the CEACAM1 (A) and the CEACAM6 (B) node, respectively. The information flow  
1374 was modeled using Hill functions. Selected trajectories are presented here.  
1375
